# **Methylome inheritance and enhancer dememorization reset**

## **an epigenetic gate safeguarding embryonic programs**

Xiaotong Wu<sup>1,\*</sup>, Hongmei Zhang<sup>1,\*</sup>, Bingjie Zhang<sup>1,\*</sup>, Yu Zhang<sup>1</sup>, Qiuyan Wang<sup>1</sup>, Weimin Shen<sup>2</sup>, Xi Wu<sup>1</sup>, Lijia Li<sup>1</sup>, Weikun Xia<sup>1</sup>, Ryohei Nakamura<sup>3</sup>, Bofeng Liu<sup>1</sup>, Feng Liu<sup>4</sup>, Hiroyuki Takeda<sup>3</sup>, Anming Meng<sup>2</sup>, Wei Xie<sup>1,#</sup>

1. Tsinghua-Peking Center for Life Sciences, School of Life Sciences, Tsinghua University, Beijing 100084, China.

2. Laboratory of Molecular Developmental Biology, State Key Laboratory of Membrane Biology, Tsinghua-Peking Center for Life Sciences, School of Life Sciences, Tsinghua University, Beijing 100084, China.

3. Department of Biological Sciences, Graduate School of Science, The University of Tokyo, Tokyo 113-0033 Japan.

4. State Key Laboratory of Membrane Biology, Institute of Zoology, Chinese Academy of Sciences, University of Chinese Academy of Science, Beijing, China.

\* These authors contributed equally.

# Correspondence should be addressed to: Wei Xie (xiewei121@tsinghua.edu.cn).

## 17 **Abstract**

18 Drastic epigenetic reprogramming is essential to convert terminally-differentiated gametes to  
 19 totipotent embryos. However, it remains puzzling why post-fertilization global DNA reprogramming  
 20 occurs only in mammals but not in non-mammalian vertebrates. In zebrafish, global methylome  
 21 inheritance is however accompanied by sweeping enhancer “dememorization” as they become fully  
 22 methylated. By depleting maternal *dnmt1* using oocyte microinjection *in situ*, we eliminated DNA  
 23 methylation in zebrafish early embryos, which died around gastrulation with severe differentiation  
 24 defects. Strikingly, methylation deficiency leads to extensive derepression of adult tissue-specific  
 25 genes and CG-rich enhancers, which acquire ectopic TF binding and, unexpectedly, H3K4me3. By  
 26 contrast, embryonic enhancers are generally CG-poor and evade DNA methylation repression. Hence,  
 27 global DNA hypermethylation inheritance coupled with enhancer dememorization installs an  
 28 epigenetic gate that safeguards embryonic programs and ensures temporally ordered gene expression.  
 29 We propose that “enhancer dememorization” underlies and unifies distinct epigenetic reprogramming  
 30 modes in early development between mammals and non-mammals.

## Introduction

DNA methylation plays critical roles in embryonic development, genomic imprinting, transposon silencing, and X chromosome inactivation (1, 2). Methylation of DNA at regulatory elements can interact with its binding proteins to exert gene repression (3, 4). In mammals, DNMT3A and DNMT3B can conduct *de novo* methylation (5). During mitosis, DNA methylation is then robustly inherited by DNMT1, facilitated by a critical co-factor UHRF1 (6). On the other hand, DNA demethylation is often carried out by members of the ten-eleven translocation (TET) family of enzymes (7, 8). Deficiency in these enzymes often leads to embryonic lethality (9, 10). DNA methylation at regulatory elements is considered to be associated with long-term and stable gene repression (3). While the numbers of promoters that are subjected to dynamic methylation are limited in the genome, DNA methylation at enhancers is highly dynamic during development and cell differentiation (11–13). Enhancer activation is often associated with hypomethylation, and hypermethylation at enhancer is shown to be repressive (14, 15). Interestingly, enhancers often remain hypomethylated even after decommitment, and such state can serve as a developmental memory, as these enhancers can be activated once the corresponding TFs re-appear (16, 17).

In mammals, DNA methylome undergoes drastic reprogramming including global demethylation in primordial germ cells (PGCs) and pre-implantation embryos, followed by genome-wide remethylation (18, 19). Such reprogramming is essential in removing genomic imprints and parental memories (20, 21). Intriguingly, despite locus-specific reprogramming, there is no global DNA methylation reprogramming during early embryonic development in many non-mammalian vertebrates, such as zebrafish (*Danio rerio*) and *Xenopus laevis* (22–25). This is surprising given histone marks, by contrast, are shown to undergo global resetting in these animals (26–29). However, the significance of the global methylome inheritance in non-mammalian vertebrates remains elusive. In particular, previous studies showed paradoxically that zebrafish mutants deficient in zygotic *dnmt1* and *uhrf1* can survive up to a week, a stage well beyond early development as the primordial organ development is largely completed (30–33). While these data argue against a role of DNA methylation in embryonic development in zebrafish, it is also possible that the maternal supplies of *dnmt1* mRNAs or proteins may be sufficient to support these mutants beyond early development. In fact, knocking down *uhrf1* using morpholino in zebrafish embryos (34) or overexpressing STELLA, a protein that

60 can sequester UHRF1 and induce DNA demethylation, in medaka embryos (Li et al., 2018a;  
61 Mulholland et al., 2020) causes significant mortality by gastrulation. However, a similar knockdown  
62 towards *dnmt1* yielded no embryonic phenotype (38). It was proposed that this discrepancy may arise  
63 from methylation-independent functions of Uhrf1 or specific methylome pattern differences between  
64 *uhrf1* and *dnmt1* mutants (38). Therefore, whether DNA methylation is required for zebrafish  
65 embryonic development remains elusive thus far.

66 Despite the persisting global DNA methylation in zebrafish early embryos, marked local DNA  
67 methylation reprogramming occurs at regulatory elements during parental-to-zygotic transition.  
68 Interestingly, while promoters undergo “bidirectional” programming including both demethylation  
69 and methylation during this process (24, 25, 27), our previous work revealed “unidirectional”  
70 reprogramming for enhancers which become fully methylated (thus “dememorized”) either prior to  
71 fertilization for sperm, or just after fertilization for oocyte (29). Enhancers are not demethylated until  
72 the phylotypic stage, when Tet proteins start to be expressed (39, 40). However, the functional  
73 significance of such enhancer dememorization and how embryonic enhancers can operate while being  
74 unusually hypermethylated (39, 41) remain unanswered.

75 Here, we interrogated the function of DNA methylome and its inheritance in early zebrafish  
76 development, by generating *dnmt1* maternal knockdown (mKD) embryos via our recently developed  
77 technology OMIS - oocyte microinjection *in situ* (42). These embryos showed drastically depleted  
78 DNA methylation prior to ZGA. Importantly, these embryos failed to initiate epiboly and died around  
79 gastrulation. Careful analyses revealed defective cell differentiation, derepression of transposons, and  
80 failed establishment of Polycomb domains. Interestingly, these mutant embryos also showed  
81 widespread ectopic activation of adult enhancers and genes. Importantly, embryonic and adult  
82 enhancers show distinct CG densities and sensitivity to DNA methylation, enabling global DNA  
83 methylation as a critical epigenetic gate (“EpiGate”) to separate embryonic and adult programs. The  
84 distinct methylation sensitivity between embryonic and adult enhancers is likely sequence coded, as  
85 adult enhancers are preferentially CG-rich, while embryonic enhancers are generally CG-poor.  
86 Collectively, our study revealed that global DNA methylome inheritance is essential for early  
87 development and cell differentiation. Coupled with enhancer dememorization, DNA methylation  
88 resets an EpiGate after fertilization which safeguards embryonic programs and prevents premature

firing of adult programs, to ensure temporally ordered activation of developmental programs. Furthermore, we propose that enhancer dememorization underlines epigenetic reprogramming of early development in both mammals and non-mammalian vertebrates, despite the distinct methylome reprogramming modes.

## Results

### Maternal *dnmt1* is essential for embryonic DNA methylation and development

To determine which Dnmts are responsible for maintaining embryonic DNA methylomes in zebrafish (Fig. 1A), we performed RNA-seq to oocyte, zygote, pre-ZGA embryos (4-cell and 256-cell), post-ZGA embryos (dome, a stage shortly after ZGA, and shield, a stage when gastrulation occurs) and larva (head and tail, 5 days post fertilization (dpf)). Remarkably high expression levels of *dnmt1* were found from oocyte to the 256-cell stage, indicating abundant maternal Dnmt1 (Fig. S1A). By contrast, the *de novo* Dnmts (Dnmt3/4/5/3b, the orthologs of mammalian DNMT3B, and Dnmt3aa/3ab, the orthologs of mammalian DNMT3A) show relatively low expression in zebrafish oocytes and early embryos. Our initial attempt to deplete Dnmt1 and DNA methylation by knocking down *dnmt1* in early embryos (zygotic knockdown, or zKD) or by knocking out zygotic *dnmt1* (zygotic knockout, or zKO) through crossing *dnmt1*<sup>+/-</sup> heterozygotes (31) failed to reduce Dnmt1 protein or DNA methylation in zebrafish early embryos (Fig. 1B-C and S1B-C). Consistent with previous studies in zebrafish (30, 31, 33), zKD and zKO embryos can survive more than one week after fertilization (Fig. S2A). We validated zKO as the methylome analysis showed that the tail and head from zKO mutants exhibited DNA methylation loss at a later stage (larva, 5 dpf) as previously described (31, 33) (Fig. 1C and S1B-C). We therefore applied OMIS (oocyte microinjection *in situ*) (Fig. 1B, Methods), a method we developed recently to target maternal factors (42), to knockdown maternal *dnmt1* starting from oocytes rather than from zygotes (termed maternal knockdown, or mKD). Briefly, we injected *dnmt1* MO into stage III oocytes (prophase I arrested oocytes, GV stage) *in situ* while they were still kept in ovary, and the recipient female zebrafish were allowed to recover and mate with wildtype male to generate embryos naturally about 40hrs post injection. We collected embryos derived from these injected oocytes (Rhodamine B traced) at the 256-cell, dome, and shield stages, and examined the states of DNA methylation (Fig. 1B). Immunofluorescence analyses showed nearly absent signals

117 of Dnmt1 protein or 5mC in mKD embryos from the 256-cell to shield stage (Fig. S1B, top). Low-  
 118 input methylome profiling using STEM-seq (43) confirmed dramatic loss of global DNA methylation  
 119 in mKD embryos at the 256-cell stage (from 85% to 20%), which is further exacerbated at dome  
 120 (17%) and shield (7%) stages (Fig. 1C and S1C). Strikingly, *dnmt1* mKD embryos displayed severe  
 121 defects and died around gastrulation (10hrs post fertilization (hpf)) (Fig. 1D-E). In wildtype embryo,  
 122 cells at the margin region of blastula embryos initiate cell movements, or “epiboly”, to form dorsal-  
 123 ventral axis at shield stage (44, 45). By contrast, *dnmt1* mKD embryos failed to initiate such epiboly,  
 124 and finally died accompanied with yolk extrusion, likely caused by the ectopic stress from cell  
 125 movement defects (Fig. 1D-E and S2B). *dnmt1* mKD embryos contain fewer cells especially after  
 126 ZGA (Fig. S2C), indicating defects in cell proliferation and/or cell apoptosis. Therefore, maternal  
 127 Dnmt1 is required for both DNA methylome inheritance and early development in zebrafish.

## 128 **The loss of maternal Dnmt1 and embryonic DNA methylomes is responsible for the early** 129 **lethality**

130 We then asked if the lethality of *dnmt1* mKD embryos is caused by the loss of DNA methylation.  
 131 First, co-injecting *dnmt1* morpholino with WT *dnmt1*, but not mutant *dnmt1* (both with codons  
 132 modified to avoid being targeted by MO; Methods), during OMIS can efficiently rescue the epiboly  
 133 delay in *dnmt1* mKD embryos (Fig. 1D-E) and restore 5mC signal at the 256-cell and dome stages,  
 134 although with final levels moderately lower than the control group (Fig. 1F). Second, we examined  
 135 whether mKD of *dnmt1* affects oocyte development. Both IF and low-coverage STEM-seq (due to  
 136 limited numbers of mutant oocytes) analyses showed that the global DNA methylation in *dnmt1* mKD  
 137 oocytes is grossly retained (Fig. 1F and S3A). In addition, the MOF (maturation, ovulation, and  
 138 fertilization) (42) rates of oocytes were comparable between control and *dnmt1* mKD oocytes (Fig.  
 139 S3B, Methods). RNA-seq of oocytes also revealed few dysregulated genes in *dnmt1* mKD oocytes  
 140 compared to control oocytes (Fig. S3C). Finally, to further rule out a role of oocyte defects in the  
 141 embryonic lethality caused by *dnmt1* mKD, we overexpressed mouse STELLA (also known as  
 142 DPPA3), a protein that can sequester UHRF1 thus preventing the proper functions of DNMT1 to  
 143 induce DNA demethylation (35–37), in zebrafish zygotes (instead of oocytes) (Fig. S3D-E). DNA  
 144 methylation is severely impaired in *Stella* overexpressed embryos (*Stella* OE) (Fig. S3E) which  
 145 showed developmental arrest at 14hrs post fertilization (somite stage) (Fig. S3F). Significant

developmental delay or embryonic lethality was observed as early as shield stage and become prevalent around the somite stage (Fig. S3F). By contrast, overexpression of a mutant STELLA deficient in interaction with UHRF1 (KRR, Methods) (35) has little impact on 5mC level (Fig. S3E) and development (Fig. S3F). Hence, we conclude that DNA methylation is essential for early zebrafish development.

## scRNA-seq analysis revealed differentiation defects in *dnmt1* mKD embryos

We then asked how transcriptome is altered in these *dnmt1*-deficient embryos. To do so, we first performed bulk RNA-seq for control and *dnmt1* mKD embryos at the 256-cell, dome and shield stages. Globally, maternal RNA (expressed in oocytes, FPKM>10) degradation was delayed in *dnmt1* mKD embryos, but was nevertheless achieved to a large degree by shield stage (Fig. 2A). Similarly, the activation of dome-specific genes (FPKM > 10 in dome embryos and not expressed in oocytes (FPKM <5)) was delayed in mutants at dome stage, and was partially recovered at shield stage (Fig. 2A). Activation of shield-specific genes (FPKM > 10 in shield embryos and not expressed in oocytes and dome (FPKM <5)) was also partially affected (Fig. 2A). Given the cell heterogeneity of gastrula, we then performed 10× single-cell RNA-seq and profiled 19,563 and 11,852 cells from control and mKD dome embryos, respectively, and 11,288 and 20,595 cells from control and mKD shield embryos, respectively (Methods) (Fig. S4A). We confirmed the scRNA-seq results with a second replicate of lower depth (Fig. S4B). Clustering analysis for integrated data of both control and mKD embryos using Seurat (46) identified a total of 10 clusters, including primordial germ cells (PGCs), enveloping layer cells (EVLs), yolk syncytial layer cells (YSLs), epiblast, ectoderm, germ ring, ventral, dorsal mesoderm and dorsal margin (Fig. 2B and S4C). Most clusters were also present in *dnmt1* mKD embryos, suggesting that these embryos were able to initiate cell differentiation (Fig. S5A). However, mutant embryos showed increased epiblast cells (Fig. S5A, red arrow) and decreased ectoderm and ventral cells (Fig. S5A, blue arrow) at shield stage (Fig. S5A-B), suggesting inefficient lineage differentiation. We then analyzed cellular trajectories of control and mKD embryos in pseudotime using Monocle 2 (47). Cell differentiation initiates from epiblast along two major trajectories, including ectoderm (mainly located on the animal pole) and mesoderm/endoderm (mainly located in marginal zone, whose precursors are arranged along the dorsal-ventral axis) (Schier and Talbot, 2005) directions in control embryos (Fig. 2C and S5C), consistent with previous



single-cell RNA-seq data in zebrafish early embryos (48, 49). By contrast, *dnmt1* mKD shield embryos exhibited multiple branches from epiblast that led to a mixture of differentiated cells and undifferentiated epiblast, suggesting aberrant differentiation programs. Consistently, downregulated genes of each cell cluster are overwhelmingly enriched for developmental genes and genes related to gastrulation and cell movement (Fig. 2D and S5D-E). Several lineage markers showed incorrect spatial expression patterns, including *tph1b*, *frzb* (for dorsal margin) and *eve1*, *dld* (for ventral margin) (Fig. S6). Notably, developmental genes, including some that are typically expressed in adult tissues such as *ntsr1*, *ncaldb*, *atxn1b*, and *lrrtm1*, were also enriched in upregulated genes in mKD embryos (Fig. 2D and S6) (discussed in detail later). Hence, scRNA-seq analysis revealed widespread differentiation defects in *dnmt1* mKD embryos.

### ***dnmt1* mKD embryo lethality is partially contributed by transposon-derepression triggered immune response and *p53*-mediated cell apoptosis**

Notably, upregulated genes in *dnmt1* mKD embryos are also enriched for *p53* signaling, cell cycle and immune response (Fig. 2D and S5E), consistent with the observation in hypomethylated *dnmt1* zKO zebrafish larva (> 3 days post fertilization) where innate immune response and *p53*-mediated cell apoptosis are often activated upon the loss of DNA methylation due to the activation of transposons (50). Indeed, using WT and *p53* null female zebrafish (51) (Fig. S7A-B), we observed increased cell apoptosis in *dnmt1* mKD *p53*<sup>+/+</sup> embryos but not in *dnmt1* mKD *p53*<sup>-/-</sup> embryos (Fig. S7C). The *dnmt1* mKD *p53*<sup>-/-</sup> embryos could now initiate epiboly movements and form dorsal-ventral axis, although with a delayed kinetics. However, these embryos eventually died around 12hpf (Fig. S7B), suggesting that *p53*-dependent cell apoptosis is only partially responsible for embryo lethality in *dnmt1* mKD embryos. Furthermore, analysis of the total RNA-seq data revealed derepression of several classes of TEs, in particular, LTRs and their subfamily *gypsy*, in mKD embryos at dome stage, which is further exacerbated at shield stage (Fig. S7D-F). This is accompanied by increased genome instability, as manifested by increased phosphorylated H2A.X signals, a marker of DNA double strand breaks (DSBs) (52) (Fig. S8A). Similar observation was made for STELLA overexpressed zebrafish embryos (Fig. S8B). We then asked whether the induced DSBs may be partially responsible for the lethality of DNA methylation-deficient embryos, by treating embryos with Foscarnet (FOS, Methods), an inhibitor of reverse transcriptases and polymerases and an effective antiviral agent (53). We used



204 *Stella* OE embryos in this experiment as *dnmt1* mKD using OMIS could not produce large numbers  
205 of embryos required for drug treatment and statistical analysis. Although effectively eliminated DSB  
206 from the *Stella* OE embryos, FOS treatment however could not rescue their developmental defects  
207 (Fig. S8B-C). These data indicate that the transcription of transposon itself, but not its retrotranscribed  
208 DNA or the subsequent DNA damage, may trigger developmental defects in *dnmt1* mKD embryo.  
209 Phosphorylation of Tbk1 (pTbk1) acts as an indicator of viral sensor signaling activation (54). The  
210 treatment of BX795, an inhibitor of pTbk1 that can repress interferon-response genes in zebrafish  
211 (50), could rescue a small fraction (9/111, 8.1%) of *Stella* OE embryos (Fig. S8C). Therefore, we  
212 conclude that *p53*-dependent cell apoptosis and pTbk1-mediated immune response, likely triggered  
213 by transposon derepression, partially contribute to developmental defects in *dnmt1* mKD embryos.

# 214 **The loss of promoter DNA methylation is responsible for part, but not all, of gene derepression** 215 **in *dnmt1* mKD embryos**

216 Next, we investigated how the transcription defects in mKD embryos are related to the loss of DNA  
217 methylation. As the lingering maternal transcripts may mask embryonic transcription, we excluded  
218 “maternal genes” (FPKM>5 in oocytes) from the analysis. Given the repressive roles of DNA  
219 methylation, we focused on upregulated genes and interrogated their expression and promoter  
220 methylation states (Fig. 3A-B). We first examined shield stage embryos, where gene upregulation is  
221 more evident in mutants (Fig. 3A-B). About 399 upregulated genes show the loss of DNA methylation  
222 at promoters, which mainly function in plasma membrane and fibronectin (involved in cell  
223 movements likely related to epiboly), cell migration and G-protein coupled receptor (Fig. 3B, red).  
224 Interestingly, the rest 260 upregulated genes showed no significant changes of DNA methylation (Fig.  
225 3B, orange). In fact, 98% of these promoters are hypomethylated in both control and mKD embryos.  
226 These genes are preferentially enriched for fin morphogenesis, blood vessel development and CNS  
227 (central nervous system) development (Fig. 3B, orange), which appear to be more related to adult  
228 tissue development. Examples of adult development related genes, including *ntsr1*, *atxn1b*, *ncaldb*,  
229 *lrrtm1*, were also observed in scRNA-seq data (Fig. S6). For convenience, we termed these two  
230 groups as “promoter methylation dependent” and “promoter methylation independent” genes. A  
231 similar analysis of dome stage embryos revealed 130 promoter methylation dependent and 54  
232 promoter methylation independent genes, with 55.4% of promoter methylation dependent genes

233 overlapping those at shield stage (Fig. S9A-B). In sum, promoter DNA methylation loss is likely  
234 responsible for some, but not all, derepressed genes.

235 Notably, despite the inheritance of global DNA methylome after fertilization, promoter-specific DNA  
236 methylation reprogramming does occur in zebrafish early embryos (24, 25). In particular, promoter  
237 methylation on the maternal genome is reconfigured (including both methylation and demethylation)  
238 to a pattern that is similar to that of the paternal genome (Fig. 3C) (24, 25). Such “sperm-like”  
239 methylome also persists to PGCs (55). The significance of such reprogramming, however, remains  
240 elusive. We identified 842 promoters that are hypomethylated in oocytes but become methylated after  
241 fertilization (Fig. S9C). About 41.0% of them are expressed during oogenesis or PGCs, and 32.5%  
242 are expressed during embryonic development or in adult tissues (Fig. S9C-D). However, only 4.8%  
243 (n=40 out of 842) of these “reprogrammed” genes are derepressed in mKD embryos by shield stage.  
244 Therefore, it appears that the function of such oocyte-to-embryo reprogramming is not just restricted  
245 to gene repression during the imminent ZGA. Rather, these data raise an interesting possibility that  
246 such reprogramming may restore promoter methylation to a “ground” state to facilitate both ZGA and  
247 future development.

248 We then asked when these derepressed genes normally express in WT zebrafish. Using a collected  
249 RNA-seq data from a total of 11 adult tissues (56), we found that 46.6% of promoter methylation  
250 dependent group are expressed in at least one adult tissue (55.0% for oocyte reprogrammed and 45.7%  
251 for non-reprogrammed, Fig. 3E). The ratio of tissue expressed genes is however substantially higher  
252 for promoter methylation independent group (78.1%, Fig. 3E, also compared to 53.3% of random  
253 genes). This also echoes GO term analysis which showed that promoter methylation independent  
254 group genes are preferentially involved in later development (such as “fin morphogenesis”, “blood  
255 vessel development” and “CNS development”) (Fig. 3B). Overall, 389 (59.0%) upregulated genes  
256 are expressed in adult tissues. To confirm that these genes are preferentially expressed later during  
257 development, we examined their expression using scRNA-seq data from 4hrs to 24hrs post  
258 fertilization of WT embryos (49). We found only 19.3% (75 of 389) are expressed prior to 24hpf  
259 (phylotypic stage), while the rest 80.7% (311) are activated at least after 24hpf (Fig. S9E). Therefore,  
260 these data indicate adult programs are aberrantly activated in *dnmt1* mKD embryos.

## 261 DNA methylation is required for the proper establishment of Polycomb domains

262 We then investigated what may contribute to promoter methylation independent gene derepression in  
 263 *dnmt1* mKD embryos. Histone modifications undergo extensive global loss and re-establishment  
 264 during early zebrafish development (26–29). In particular, Polycomb domains, marked by the  
 265 repressive marks H3K27me3 and H2AK119ub, are established around ZGA (57–59). These marks,  
 266 deposited by PRC2 and PRC1, respectively, are critical repressors for key developmental genes (60).  
 267 Thus, we collected *dnmt1* mKD embryos at dome and shield stages and performed H3K27me3 and  
 268 H2AK119ub CUT&RUN (61). Strikingly, H3K27me3 and H2AK119ub re-establishment are  
 269 severely impaired in *dnmt1* mKD embryos (Fig. 4A-B and S10A). About 51.7% (420/808) promoter  
 270 H3K27me3 peaks are lost or strongly reduced in *dnmt1* mKD embryos. Interesting, the rest (48.3%,  
 271 388/808) appear to be largely intact (Fig. 4B). These two groups show similar enrichment for  
 272 developmental genes (Fig. S10B), although their promoters appear to enrich for distinct TF motifs  
 273 (Fig. 4B). Although both classes of promoters are enriched for CGs, the “retained” group show higher  
 274 CG levels at promoters (Fig. 4B-C), consistent with the notion that CG-rich sequences can recruit  
 275 Polycomb (62). The fact that these marks at some, but not other, genes are affected suggest that this  
 276 is not simply due to developmental delay. IF analysis also excluded a possibility of global H3K27me3  
 277 decrease in mKD embryos (Fig. S10C). A similar trend was observed for H2AK119ub (Fig. 4A-B).  
 278 This result is reminiscent of the observation in mouse ESCs, where the loss of global DNA  
 279 methylation leads to decrease of promoter H3K27me3 (63, 64), and supports the model that the  
 280 absence of DNA methylation in the genome elsewhere may allow the spreading and/or recruitment  
 281 of Polycomb, which in turn dilutes Polycomb and H3K27me3 away from promoters (Bartke et al.,  
 282 2010; Brinkman et al., 2012; Hagarman et al., 2013; Reddington et al., 2013; Wu et al., 2010).  
 283 Nevertheless, the decreased H3K27me3 and H2AK119ub did not cause apparent widespread gene  
 284 derepression (Fig. 4C-D), as only 38 (9.1%) genes that lost promoter H3K27me3 showed moderate  
 285 derepression, including *bdnf*, *pax7b* and *tat* (Fig. 4D). Therefore, these data demonstrate that DNA  
 286 methylation is crucial for proper establishment of Polycomb domains at developmental gene  
 287 promoters in early zebrafish embryos. However, the loss of repressive marks, such as H3K27me3 and  
 288 H2AK119ub, cannot fully explain promoter methylation-independent gene derepression in *dnmt1*  
 289 mKD embryos.

## 290 **Loss of DNA methylation results in aberrant activation of adult enhancers with ectopic** 291 **H3K4me3 and TF binding**

292 Besides promoters, distal regulatory elements, such as enhancers, play crucial roles in gene regulation  
293 (69). To ask whether they may play a role in gene derepression in *dnmt1* mKD mutants, we profiled  
294 histone marks H3K4me3, H3K4me1, H3K27ac (Methods), and chromatin accessibility using ATAC-  
295 seq (70, 71). Strikingly, we found that H3K4me3, a typical permissive promoter mark, is highly  
296 dynamic upon the loss of DNA methylation especially in distal regions (Fig. 5A-B). While the overall  
297 numbers of promoter H3K4me3 peaks showed a moderate decrease from 19,385 to 16,913, the distal  
298 H3K4me3 peaks increase dramatically from 2,099 to 13,457 (Fig. 5A). As a result, the ratio of distal  
299 H3K4me3 peaks among all H3K4me3 peaks increases substantially from 9.8% in control to 44.3%  
300 in mKD embryos. Even after excluding weak distal H3K4me3 peaks (normalized RPKM < 0.5 in  
301 both control and mKD samples), there are still 7,580 distal H3K4me3 peaks left. To rule out the  
302 possibility that these regions may be unannotated promoters, we further excluded distal H3K4me3  
303 peaks that overlap with any H3K4me3 peaks (promoter mark) in adult tissues (56) and unmethylated  
304 regions in the 256-cell embryos (when all enhancers are presumably methylated, leaving only  
305 promoters unmethylated) (29) (Methods). This still yielded a total of 6,380 distal H3K4me3 peaks.  
306 Such widespread distal H3K4me3 is unique to mutant embryos, as we only identified 32 distal  
307 H3K4me3 peaks specifically in control embryos, and 298 peaks present in both control and mKD  
308 embryos (Fig. 5C). To understand the nature of these ectopic distal H3K4me3 sites, we mapped the  
309 states of DNA methylation, H3K27ac, H3K4me1, open chromatin (ATAC-seq) and CG density in  
310 different groups based on whether a distal H3K4me3 peak is lost, ectopically acquired or retained in  
311 mutant (Fig. 5C). Indeed, ectopic distal H3K4me3 sites also showed substantially increased H3K27ac,  
312 H3K4me1, and chromatin accessibility, as manifested globally (Fig. 5C) and also at individual genes  
313 (Fig. 5D), indicating enhanced regulatory activities. Notably, a fraction of these regions (11.4%) also  
314 showed H3K27ac in control embryos (dome and shield), suggesting that these elements are likely  
315 active in WT embryos and their activities further increased in mutants (discussed later).

316 Given H3K27ac, accessible chromatin, and, in particular, H3K4me1, are considered as hallmarks for  
317 enhancers (69), we then asked if these elements are possibly enhancers. As the majority of them are  
318 not active in control early embryos, we examined their chromatin states in 11 adult tissues (56).

Encouragingly, 24.2% (1,547/6,380) are marked by H3K27ac, which marks active enhancers (72), in at least one adult tissue (Fig. 6A). Enhancers can also stay in poised or decommissioned states, which no longer bear H3K27ac, but are still marked by accessible chromatin or DNA hypomethylation (16, 17, 73). Strikingly, more than half (54.4%, 3,472/6,380) of these ectopic distal H3K4me3 overlap with lowly methylated regions (LMRs) identified in tissues (Fig. 6B). The ectopic H3K4me3 peaks also precisely align with the center of LMRs. Overall, we found that among all 6,380 ectopic distal H3K4me3 sites, the majority (63.1%, 4,026/6,380) overlap with putative enhancers that are either active (marked by H3K27ac) or poised/decommissioned (marked by LMRs or accessible chromatin) in at least one of 11 adult tissue lineages (Fig. 6C). By contrast, only a small fraction (11.4%) overlaps with early embryonic putative enhancers (dome and shield stages). The rest 1,628 (25.5%) peaks did not overlap with adult enhancers or embryonic enhancers (Fig. 6C, “Rest”). We expect that this number would further decrease when adding additional tissue types and developmental stages. Finally, we asked if the presumably derepressed enhancers are within the proximity of derepressed genes. Indeed, these putative enhancers are closer to upregulated genes but not to downregulated genes or non-DEGs (differentially expressed genes) (Fig. 6D). Hence, these data suggest that these ectopic distal H3K4me3 sites preferentially occupy putative adult enhancers, which are linked to derepression of adult genes.

Finally, we asked if ectopically activated enhancers can indeed recruit TFs. The pluripotency factor SoxB1 is critical for ZGA and early development in zebrafish (74). SoxB1 includes six Sox genes *sox1a/1b/2/3/19a/19b* (75). We chose Sox2, one of the earliest zygotic genes activated (4.3 hpf) (76) for which an antibody is conveniently available, and performed CUT&RUN (61) in control and *dnmt1* mKD embryos at shield stage (Fig. S11A). Reassuringly, Sox2 binding in both control and mKD mutants enriches for Sox2 motif (Fig. S11B). Ectopic Sox2 binding occurs in at least 570 ectopic H3K4me3 sites, preferentially aligning at centers of these H3K4me3 peaks (Fig. 6E-F). About 12.7% (186/1,463) of ectopic H3K4me3 sites with *sox2* motif acquire Sox2 binding, while the number decreased to 7.8% (384/4,917) for ectopic H3K4me3 without *sox2* motif (p-value = 3e-8) (Fig. S11C). These Sox2 ectopic binding sites are also closer to derepressed genes in mKD mutants, although it did not reach statistical significance due to the limited numbers of genes (Fig. S11D). Hence, ectopically activated adult enhancers recruit TFs and are correlated with gene derepression.

**Embryonic and adult enhancers exhibit distinct DNA methylation sensitivity and CG densities**

While DNA methylation appears to repress adult enhancers, intriguingly, it was reported that embryonic enhancers are hypermethylated and hence are insensitive to DNA methylation in zebrafish early embryos (39, 41). This is attributed to the absence of TET proteins, the key regulatory enzymes of DNA demethylation, as its expression is not detectable in zebrafish embryos until 24hrs post fertilization (the phylotypic stage) (Fig. S11E) (40) (39). It remains elusive why DNA methylation can repress adult enhancers but not embryonic enhancers. Furthermore, given the large numbers of adult enhancers present in the genome (n=60,728 across 11 adult tissues) (Fig. 6G), clearly not all adult enhancers are derepressed and acquire ectopic H3K4me3 in *dnmt1* mutant embryos. To understand why certain enhancers are selectively sensitive to DNA methylation and are prone to ectopic H3K4me3 acquisition, we identified early embryonic enhancers (dome and shield stages) and adult enhancers (across 11 adult tissues) using distal H3K27ac and removed those overlapping with annotated promoters or H3K4me3 in adult tissues (promoter mark) (Methods). We confirmed that while both carry H3K27ac (as defined), embryonic enhancers and adult enhancers are hypermethylated and hypomethylated, respectively (Fig. 6H and S11F). Interestingly, adult enhancers, but not embryonic enhancers, showed elevated CG densities compared to the background (Fig. 6H). Importantly, such high CG density of adult enhancers is much more evident for those that acquire ectopic H3K4me3 upon the loss of DNA methylation (H3K4me3+), but less so for those that did not gain ectopic H3K4me3 (H3K4me3-) (Fig. 6H). This is consistent with the notion that CG-rich sequences can attract histone methyl-transferases such as MLL1/2, which contain the CXXC domain that recognizes unmethylated CpG regions (77, 78). Furthermore, adult enhancers that show ectopic H3K4me3 are generally inaccessible in control early embryos, but become accessible in *dnmt1* mKD mutants (Fig. 6I). By contrast, H3K4me3- adult enhancers are weakly accessible, and such accessibility are even somewhat decreased upon the loss of DNA methylation. Interestingly, such difference appears to be also true for embryonic enhancers. A small portion of embryonic enhancers (7.4%, n=726) also acquired H3K4me3 upon the loss of DNA methylation (Fig. 6I). Despite the overall low CG density of embryonic enhancers, these H3K4me3+ embryonic enhancers also showed a slightly higher CG density compared to H3K4me3- enhancers (Fig. 6I). Importantly, only H3K4me3+, but not H3K4me3-, embryonic enhancers showed increased chromatin accessibility in *dnmt1* mKD embryos (Fig. 6I). Notably, the CG densities of H3K4me3+ embryo-specific enhancers



are overall still low compared to adult enhancers (Fig. 6I and S11G). In sum, these data revealed that adult enhancers are preferentially CG-rich, more sensitive to DNA methylation, and are prone to acquire ectopic H3K4me3 and increased chromatin accessibility upon the loss of DNA methylation.

Enhancers are activated by interacting TFs (69, 79). Therefore, we asked if the differential activation of H3K4me3<sup>+</sup> and H3K4me3<sup>-</sup> adult enhancers may be related to different sets of TFs and whether these TFs are present in early embryos. By searching for TF motif in these enhancers, we found distinct motifs present between H3K4me3<sup>+</sup> and H3K4me3<sup>-</sup> adult enhancers, as well as between adult active enhancers (H3K27ac<sup>+</sup>) and adult decommissioned enhancers (H3K27ac<sup>-</sup> but ATAC<sup>+</sup>/LMR<sup>+</sup>) (Fig. S11H). Importantly, most TFs of which the motifs are found in H3K4me3<sup>+</sup> adult enhancers are expressed in both embryos and adult tissues. By contrast, many TFs of which the motifs are enriched in H3K4me3<sup>-</sup> adult enhancers are highly expressed in adult tissues but not in early embryos (Fig. S11H, red arrow). In this analysis, we averaged gene expression for TFs from the same family but with almost identical motifs (such as *gata*, *fox* etc.). Hence, the activation of H3K4me3<sup>+</sup> adult enhancers in *dnmt1* mKD embryos may be due to both their sensitivity to DNA methylation and the presence of corresponding TFs in early embryos. Meanwhile, the GREAT analysis (80) revealed that genes near H3K4me3<sup>+</sup> adult enhancers are enriched for those functioning in FGF and Wnt signaling pathway; on the other hand, H3K4me3<sup>-</sup> adult enhancers are more enriched for kinase signaling pathway, regulation of cell cycle, etc. (Fig. S11I). Finally, we reasoned that if DNA methylation interferes TF binding at CG-rich enhancers, these TFs may be more likely to contain CG in their motifs. Indeed, TF motifs identified from embryonic enhancers are less likely to contain CGs than those from adult enhancers (Fig. 6I, far right, bar chart). However, exceptions are TF motifs identified in both H3K4me3<sup>+</sup> embryonic and adult enhancers, which preferentially possess CGs. In sum, these data suggest that adult enhancers are preferentially CG-rich and interact with CG-containing TFs. By contrast, embryo-specific enhancers tend to be CG-poor and interact with CG-less TFs. Given the absence of Tet proteins in early embryos (Fig. S11E) (39), these data suggest that the inherited DNA methylation, coupled by enhancer dememorization, presents an epigenetic gate that prevents premature firing of adult enhancers and transcription programs without interfering embryonic programs (Fig. 7A).

## Discussion



407 The reprogramming of DNA methylation in mammals is critical for successful parental-to-embryonic  
 408 transition and epigenetic memory resetting between generations. However, many non-mammalian  
 409 vertebrates appear to lack such global reprogramming (22–25). To date, why DNA methylation  
 410 undergoes such distinct reprogramming modes between mammals and non-mammals remain elusive.  
 411 This is particular intriguing given histone marks undergo global resetting in both mammals and non-  
 412 mammalian vertebrates (26–29, 81). Here, we sought to decipher this mystery by depleting maternal  
 413 *dnmt1* in zebrafish early embryos, which revealed an essential role for inherited DNA methylation in  
 414 early embryonic development. Moreover, such methylome, when coupling with enhancer  
 415 dememorization, restores a full methylome to guard against premature activation of adult programs  
 416 through repressing adult enhancers (Fig. 7A). Hence, enhancer dememorization resets the  
 417 developmental clock by restoring a “ground state” free of parental epigenetic memories. Interestingly,  
 418 such epigenetic resetting is similarly achieved in mammals but through distinct paths, as global  
 419 demethylation and remethylation essentially also remove parental epigenetic memories at enhancers  
 420 (Fig. 7B). Therefore, enhancer dememorization may underlie and potentially unify distinct epigenetic  
 421 reprogramming modes between mammals and non-mammalian vertebrates.

## 422 **Inherited DNA methylation is essential for early development and proper cell differentiation**

423 Single-cell RNA-seq analysis revealed that a subset of developmental genes showed downregulation  
 424 in *dnmt1* mKD embryos, which are likely indirectly caused by failed differentiation. Differentiation  
 425 defects are partially attributed to TE-derepression induced immune response and *p53*-mediated  
 426 apoptosis and cell cycle arrest, as inhibiting *p53* or immune signaling pathways partially rescued the  
 427 differentiation defects. However, most of these animals still experience embryonic lethality,  
 428 suggesting that such developmental defects likely stem beyond transposon derepression. In fact, we  
 429 recently showed that in mouse ESCs that are deficient for all regulatory enzymes of DNA methylation  
 430 (DNMT3A/3B/3C and TET1/2/3) except for DNMT1, the global DNA methylome is well maintained  
 431 but becomes static (Wang et al., 2020). While the silencing of transposons is expected to be not  
 432 affected, this mESC line still failed to differentiate, suggesting that TE-silencing independent function  
 433 of DNA methylation may also contribute to differentiation defects.

## 434 **Promoter DNA methylation reprogramming during the oocyte-to-embryo transition**

435 Despite the global inheritance of methylome, dynamic methylation reprogramming does occur at  
 436 regulatory elements such as promoters and enhancers in early zebrafish embryos (24, 25, 29). In  
 437 particular, the maternal methylome is conformed to a state that highly resembles that of sperm,  
 438 including both gain and loss of DNA methylation at specific promoters. Notably, such reprogramming  
 439 does not depend on sperm, as it can occur even when sperm DNA was disrupted (25). Therefore, we  
 440 previously proposed that both oocyte and sperm are perhaps reprogrammed to an “embryonic state”  
 441 (29). While such reprogramming occurs after fertilization for the maternal genome, it may occur even  
 442 before fertilization for sperm, as supported by the full methylation of enhancers in sperm. The  
 443 significance of this intriguing phenomenon, however, remained unclear. One plausible possibility is  
 444 that such transformation may help prepare gene activation and silencing during the forthcoming ZGA.  
 445 However, our data showed that among genes that are hypomethylated in oocytes but become  
 446 hypermethylated in embryos, only a small subset of genes are derepressed in *dnmt1* mKD embryos.  
 447 The majority of these genes remain silenced by shield stage (Fig. S9C-D), suggesting that such  
 448 conversion do not seem to solely serve the immediate gene repression after fertilization. Alternatively,  
 449 such reprogramming may be important not only for ZGA, but also for future development. By  
 450 resetting adult and gametic epigenetic memories to a “ground state”, DNA methylation  
 451 reprogramming may facilitate future gene regulation when stage-specific activators and repressors of  
 452 promoters and enhancers appear in a spatiotemporally controlled manner.

### 453 **Reprogramming of enhancers resets an epigenetic gate that prevents precocious activation of** 454 **adult programs**

455 The idea that DNA methylome reprogramming may have a larger impact beyond ZGA and create a  
 456 ground state is strongly supported by further analyses of enhancers. Nearly all enhancers in zebrafish  
 457 gametes are dememorized through DNA hypermethylation in early development (29). This essentially  
 458 creates a methylome free of past enhancer memories and thus represents a likely “ground” epigenetic  
 459 state. Moreover, hypermethylation of enhancers also prevents precocious activation of adult  
 460 enhancers in early embryos.

461 Mechanistically, this is probably due to the absence of Tet proteins which are not expressed until the  
 462 phylotypic stage. By contrast, mammalian TET proteins are expressed throughout pre- and post-

463 implantation stages and play critical roles at enhancers during gastrulation (9, 82). The motivation  
 464 underlying Tet's absence in early zebrafish embryos remains unknown. One possibility may lie in the  
 465 different cell cycle speed in early embryos between mammals (such as 24hrs per cell cycle for  
 466 cleavage-stage mouse embryos) and cold-blooded vertebrate animals (such as 15 min per cell cycle  
 467 for zebrafish pre-ZGA embryos). It is tempting to speculate that TETs, even if expressed, may not  
 468 properly function at enhancers in such rapidly dividing cells. After 24hrs post fertilization, the cell  
 469 cycle prolongs to more than 3hrs (32), which is perhaps more accessible for the epigenome editing  
 470 enzymes such as Tets.

471 The absence of Tets presumably also creates a potential challenge for embryonic enhancers to  
 472 function given their hypermethylated states. Interestingly, our analyses revealed that embryonic  
 473 enhancers tend to be CG-poor, and are thus less likely to be affected by DNA methylation. In addition,  
 474 TFs that potentially bind these enhancers tend to contain fewer CGs in their recognition motifs (Fig.  
 475 S11H). We propose that these enhancers may have adopted these sequence features during evolution  
 476 to survive without TETs. By contrast, adult enhancers tend to be relatively CG rich and are bound by  
 477 TFs that contain CGs in their motifs. Upon the loss of DNA methylation, many putative CG-rich adult  
 478 enhancers become aberrantly activated, as indicated by their acquisition of active marks such as  
 479 H3K4me1, H3K27ac, H3K4me3, increased chromatin accessibility, and precocious activation of their  
 480 neighbor genes. Therefore, these data demonstrate that DNA methylome may play a critical role in  
 481 ensuring temporally ordered enhancer activation during development. Collectively, our data showed  
 482 that the inherited global DNA methylome, coupled by enhancer dememorization, plays an essential  
 483 role in embryonic development by repressing transposons and restoring an epigenetic gate that guards  
 484 against premature activation of adult programs (Fig. 7A). Future studies are warranted to determine  
 485 whether similar mechanisms (such as enhancer dememorization) can be applied to other  
 486 reprogramming processes to reset the epigenetic clock and restore cells from differentiated or aged  
 487 states back to a ground state of totipotency.

488

## 489 **Materials and Methods**

### 490 **Zebrafish strain and fertilized egg microinjection**

491 The wild type AB (female) strains were used in most experiments. The *p53*<sup>M214K</sup> line (51) and the *dnmt1*<sup>s872</sup> (31)  
492 lines were described previously. Embryos derived from *dnmt1*<sup>s872</sup> heterozygous intercrosses were identified by PCR  
493 genotyping at desired stages. Ethical approval was obtained from the Animal Care and Use Committee of Tsinghua  
494 University. All experimental animal procedures were performed under anesthesia, and all efforts were made to  
495 minimize suffering.

496 For 1-cell microinjection, mouse Stella mRNAs were injected into naturally fertilized 1-cell stage embryos,  
497 according to a commonly used zebrafish microinjection protocol (83). After injection, embryos were grown in fresh  
498 Holtfreter solution (0.05 g/L KCl, 0.1 g/L CaCl<sub>2</sub>, 0.025 g/L NaHCO<sub>3</sub>, 3.5 g/L NaCl, pH 7.0) at 28.5°C and were  
499 staged according to standard morphological criteria (32). The dose of mouse Stella mRNA was 550 pg per embryo.

### 500 ***dnmt1* mKD with oocyte microinjection *in situ* (OMIS)**

501 Briefly, on the first day of OMIS (42), adult females at 5-12 month old were anesthetized in 550 µg/ml tricaine  
502 (Sigma, Cat A5040) in a petri dish. Then the fish was placed on a damp sponge with specific buffer (5.4 mM KCl,  
503 136.8 mM NaCl, 4.2 mM NaHCO<sub>3</sub>, 0.44 mM KH<sub>2</sub>PO<sub>4</sub>, 0.25 mM Na<sub>2</sub>HPO<sub>4</sub>, and 0.5% (wt/vol) BSA). A cut was  
504 made on one side of belly to expose the ovary. The diluted MOs were microinjected into each oocyte. Rhodamine  
505 B (Sigma, Cat R8881) was co-injected with MOs as a dye. After injection, the wound on the belly was sewed with  
506 a surgical sewing needle carefully and quickly. Once the operation was done, the female was transferred into fish  
507 water supplemented with 32 µg/ml tricaine, 10 unit/ml penicillin and 10 µg/ml streptomycin (HyClone, Cat  
508 SV30010). Then the fish was transferred to fish water containing gradually reduced concentrations of tricaine. In  
509 the evening of the second day, the female was paired with a wild type male. In the morning of the third day, the pair  
510 started to chase and lay fertilized eggs naturally. The injected oocyte-derived embryos were identified by co-injected  
511 dye (rhodamine B) at very early developmental stages. The injection doses of *dnmt1*-MO and standard control MO  
512 (cMO) were both 5 ng per oocyte in the same assay. The sequences of MOs are 5'-  
513 ACAATGAGGTCTTGGTAGGCATTTC-3' (*dnmt1*-MO) (84), and 5'-CCTCTTACCTCAGTTACAATTTATA-3'  
514 (cMO). MOs were dissolved in RNase-free water, and heated to 65°C for 10 min before microinjection.

### 515 **Tissue collection**

516 Embryos at 5 days post fertilization were euthanized with tricaine, and head and tail were dissected carefully by  
517 tweezers. After brief grinding, tissues were frozen at -80°C for later usage.

### 518 **Immunofluorescence and imaging**

519 The embryos at the defined time points after fertilization were fixed by 4% polyformaldehyde overnight at 4°C.  
520 Then they were dechorionated manually and dehydrated with methanol. The whole-mount immunofluorescences  
521 with Dnmt1 antibody (Santa Cruz, Cat sc-20701), 5mC antibody (Abcam, Cat ab10805), and pH2A.X antibody  
522 (Cell Signaling, Cat 2577S), were done with DAPI (Invitrogen, Cat D1306) staining and performed as previously  
523 described (85). The secondary antibodies were Alexa Fluor® 488 conjugated anti-rabbit and Alexa Fluor® 488  
524 conjugated anti-mouse (Jackson ImmunoResearch, 1:200 diluted). After staining, embryos were deyolked by  
525 tweezers and mounted on glass slides in mounting medium (Sigma, Cat P3130) at animal polar upturned position.  
526 Images were acquired on 710 or 880 META laser scanning confocal microscope and manipulated by ZEN software.

527 Treated or untreated embryos were anesthetized at desired stages with 0.02% tricaine and mounted in 5% methyl  
528 cellulose (Sigma, Cat M-6385) for observation, and phenotype pictures were taken under Nikon SMZ1500  
529 microscope.

### 530 ***dnmt1* rescue**

531 The full-length *dnmt1* coding sequence from zebrafish was cloned into pXT7 vector and linearized by SmaI  
532 digestion. mRNA was synthesized in vitro using mMESSAGE mMACHINE kit (Ambion, Cat AM1344) and  
533 purified using RNeasy Mini kit (Qiagen, Cat 74104). To avoid binding of *dnmt1* mRNA with MO, the target  
534 sequence of MO was mutated without affecting amino acid sequence (WT mis-*dnmt1* mRNA). Catalytic mutant  
535 *dnmt1* mRNA was designed according to s872 mutant (31), which contains a stop codon in catalytic domain  
536 resulting the loss of function of Dnmt1 (Mut mis-*dnmt1* mRNA). These mRNAs were co-injected with MO into  
537 GV oocytes by OMIS (42) for rescue experiment. Embryos at desired stages were then collected for further analysis.

### 538 **Mouse Stella overexpression**

539 The construct containing full-length Stella coding sequence from mouse was generated and linearized by NotI  
540 digestion. The mutant Stella (KRR, K85E/R86E/R87E) contains 3 amino acids mutations within the nuclear export  
541 signal as previously described (35). mRNA was synthesized in vitro using mMESSAGE mMACHINE kit (Ambion,  
542 Cat AM1344) and purified using RNeasy Mini kit (Qiagen, Cat 74104). These mRNAs were injected into zygotes,  
543 and embryos at desired stages were collected for further analysis.

### 544 **TUNEL**

545 ApopTag Red In Situ Apoptosis Detection Kit (Millipore, Cat S7165) was used to probe cell apoptosis in zebrafish  
546 embryo as previously described (86). Collected embryos at desired stages were fixed by 4% polyformaldehyde  
547 overnight at 4°C, then dechorionated manually and dehydrated with methanol. After being stored at -20°C for 1hr,  
548 embryos were rehydrated with 0.1% PBST (0.1% Triton-X 100 in PBS), then re-fixed with 4% polyformaldehyde  
549 for 20min at room temperature and put into precooled ethanol-ethyl acetate mixture (volume ratio 2:1). Next, 50 µl  
550 equilibration buffer was added into tubes contained embryos at room temperature for 1hr, and changed with 55 µl  
551 TdT reaction system (38.5 µl reaction buffer and 16.5 µl TdT enzyme) at 37°C more than 1hr to add Digoxin labeled  
552 dUTP in DNA breaks. To stop reaction and visualize Degoxin signals, embryos were washed with STOP/Wash  
553 buffer and incubated with anti-Digoxin antibody coupled with Rhodamine buffer (34 µl blocking buffer and 31 µl  
554 antibody) at 37°C for 30min or overnight. DNA was stained with DAPI. After staining, embryos were mounted in  
555 the same way as immunofluorescence and imaged on 710 or 880 META laser scanning confocal microscope.

### 556 **Inhibitor treatment**

557 To inhibit the reverse transcription, embryos were treated with 50 µM Foscarnet (Selleck, Cat S3076). To inhibit  
558 the immune response, embryos were treated with 0.1 µM or 0.01 µM BX795 (Selleck, Cat S1274). Embryos treated  
559 with DMSO were used as control. All these embryos were examined for phenotypes and fixed for immunostaining  
560 at desired stages. Phenotype at 24hrs post fertilization was quantified and summarized.

### 561 **STEM-seq library preparation**

562 STEM-seq was carried out as described previously (43). The deyolked embryos and tissues were lysed with 20 µl  
563 lysis buffer (10 mM Tris-HCl, pH 7.4, 10 mM NaCl, 3 mM MgCl<sub>2</sub>, 0.1 mM EDTA, pH 8.0, 0.5% NP-40) and 2 µl  
564 protease K (Roche, Cat 10910000) for at least 3hrs at 55°C. After heat-inactivation, spike-in λ-DNA (Promega, Cat

565 D150A) was added at a mass ratio of 1/200. Bisulfite conversion was performed with the EpiTect Fast Bisulfite  
566 Conversion Kit (Qiagen, Cat 59824). The converted DNA was subjected to column purification and desulfonation  
567 on MinElute DNA spin columns (Qiagen, Cat 59824) with carrier RNA (Qiagen, Cat 59824) according to the  
568 manufacturer's instructions. The purified DNA was eluted in 30 µl of elution buffer and ready for TELP library  
569 preparation (87).

## 570 **Total RNA-Seq library preparation and sequencing**

571 The embryos were dechorionated manually by tweezers and transferred into 750 µl Trizol (Invitrogen, Cat  
572 15596018). About 10 fresh embryos were transferred into Trizol and vortexed until no visible particles. 150 µl  
573 chloroform (Amresco, Cat 0757) was added and mixed thoroughly. The mixture was then transferred into  
574 phasemaker tube (Invitrogen, Cat A33248) and spun at 14,000 rpm for 15 min. Next, the top phase was taken out  
575 from the tube, and 1 µl LPA was added (Sigma, Cat 56575) and mixed well using pipettes. Then, RNA was  
576 precipitated by adding 750 µl isopropanol (Sigma, Cat 59304) at -20°C overnight. At the next day, the tube was  
577 spun at 14,000 rpm for 30 min and supernatant was removed. The pellet was washed with fresh 70% ethanol, re-  
578 suspended in 20 µl RNase-free water and stored at -80°C for later usage.

579 NEBNext rRNA Depletion Kit (NEB, Cat E6310S) was used to deplete ribosomal RNA according to the  
580 manufacture's instruction. Briefly, rRNA were hybridized with probes and digested with RNase H, then excess  
581 probes were digested with DNase I. After that, NEBNext RNA sample purification beads were used to purify rRNA  
582 depleted RNA. Purified RNA was fragmented before cDNA synthesis at 95°C for 8 min. Double-stranded cDNA  
583 was synthesized with NEB Next first-strand (NEB, Cat E7771S) and second-strand synthesis modules (NEB, Cat  
584 E7550S), then purified with Ampure XP beads (Beckman, Cat A63882). Synthesized cDNA was subjected to library  
585 preparation with NEBNext Ultr II DNA Library Prep Kit (NEB, Cat E7645S). DNA was end-repaired, adenylated,  
586 and ligated to TruSeq sequencing adaptors. DNA was amplified using KAPA HF HotStart ReadyMix  
587 (KAPABiosystem, Cat RR2602). The amplified DNA was size-selected using Ampure XP beads for 200-500 bp  
588 DNA fragments. All libraries were sequenced by Illumina Hi-Seq 1500 or 2500 or XTen platform according to  
589 manufacturer's instruction.

## 590 **Single-cell RNA-seq library preparation and sequencing**

591 Cell dissociation protocol was based on a previously described method (48) with modifications to adapt it for 10×  
592 Genomics platform. Briefly, *dnmt1* mKD and control embryos were collected 20 min after fertilization and cultured  
593 as mentioned before. Then 15 embryos at dome or shield stages for each sample were transferred into plastic Petri  
594 dishes that had previously been coated with 2% agarose and soaked with DMEM/F12 medium (Gibco/Life  
595 Technologies, Cat 11330032) at least 2hrs. Next, embryos at desired stages were dechorionated and deyolked  
596 manually by forceps and transferred to a 1.5 ml Eppendorf tube with 50 µl DMEM/F12 medium. Dissections were  
597 performed for up 15 min. The volume of DMEM/F12 medium containing embryos was adjusted to 200 µl, and then  
598 cells were mechanically dissociated by flicking the tube 30 times and pipetting mixture 10 times through a 200 µl  
599 tip. The volume was adjusted to 1 ml with PBS containing 1.0% BSA, and spun to pellet cells at 300 g for 30s. The  
600 supernatant was removed and cells were resuspended in 80 µl of PBS containing 0.1% BSA and 20% Optiprep  
601 (StemCell, Cat 07820), aiming for a concentration above 300 cells/µl. Cells were then passed through a cell sieve  
602 (100 µm for dome stage and 70 µm for shield stage).

603 Single-cell RNA-seq library was performed with Chromium Next GEM Single-cell kit (10× Genomics, Cat PN-  
604 1000121) based on the standard protocol. All libraries were sequenced by Illumina Hi-Seq 1500 or 2500 or XTen  
605 platform according to manufacturer's instruction.



## 606 CUT&RUN library preparation and sequencing

607 CUT&RUN was conducted as previously described (61, 88) with modifications in cell permeation to adapt it for  
 608 zebrafish embryos. Embryos were deyolked by tweezers manually and transferred into 1.5 mL conventional, non-  
 609 low-binding tube (Axygen). Then tubes were flicked several times to disperse cells in embryos, and resuspended  
 610 by 60  $\mu$ l washing buffer (20 mM HEPES-KOH, pH = 7.5; 150 mM NaCl; 0.5 mM Spermidine and Roche complete  
 611 protease inhibitor). 10  $\mu$ l Concanavalin-coated magnetic beads (Polyscience, Cat 86057) for each sample were  
 612 gently washed twice, resuspended by binding buffer (20 mM HEPES-KOH, pH = 7.5; 10 mM KCl; 1 mM CaCl<sub>2</sub>;  
 613 1 mM MnCl<sub>2</sub>), and added carefully to the cells. The cells with beads were incubated at 23°C for 30 min on  
 614 Thermomixer (Eppendorf) at 400 rpm, then held at magnetic stand to exclude buffer, and resuspended by 75  $\mu$ l  
 615 antibody buffer (washing buffer supplied with 0.02% digitonin and 2 mM EDTA, freshly made) with antibodies  
 616 against H3K4me<sub>3</sub> (in-house) (89), H3K27me<sub>3</sub> (Active Motif, Cat 61017), H2AK119ub (CST, Cat 8240s), or Sox2  
 617 (Active Motif, Cat 39843) diluted at ratio of 1:100. Then the samples were incubated at 4°C on Thermomixer  
 618 overnight at 400 rpm. On the second day, the samples were washed by digitonin-washing buffer several times on  
 619 magnetic stand, and resuspended with 50  $\mu$ l digitonin-washing buffer supplied with 700 ng/ml pA-MNase, and  
 620 incubated at 4°C on Thermomixer for 3hrs at 400 rpm. After that, the cells were washed by digitonin-washing buffer  
 621 on magnetic stand, and resuspended by 100  $\mu$ l digitonin-washing buffer on ice for at least 2 min. Targeted region  
 622 digestion was activated by adding 2  $\mu$ l 100 mM CaCl<sub>2</sub> for 30 min in ice, then stopped by 100  $\mu$ l 2 X stop buffer  
 623 (340 mM NaCl; 20 mM EDTA, pH = 8.0; 4 mM EGTA, pH = 8.0; 50  $\mu$ g/ml RNase; 100  $\mu$ g/ml glycogen; 0.02%  
 624 digitonin supplied with spike-in DNA) and fully vortexed. To release fragments, the samples were incubated at 37°C  
 625 on Thermomixer at 400 rpm for 20 min. Then the supernatants were purified by phenol chloroform and ethanol  
 626 purification, and subjected to Tru-seq library construction using NEBNext Ultra II DNA Library Prep kit (NEB, Cat  
 627 E7645S) as standard protocols. The amplified DNA was size-selected using AMPure Beads for 200-800 bp DNA  
 628 fragments. All libraries were sequenced by Illumina Hi-Seq 1500 or 2500 or XTen platform according to  
 629 manufacturer's instruction.

## 630 STAR ChIP-seq library preparation and sequencing

631 The STAR ChIP-seq was performed as previously described (29). Embryos were deyolked by repeatedly blowing  
 632 with a 200  $\mu$ l pipette and cell pellets were collected by spinning down at 5000 rpm for 5 min at 4°C. After centrifuge,  
 633 cell pellet was lysed in 40  $\mu$ l lysis buffer (0.5% NP-40, 0.5% Tween, 0.1% SDS and proteinase inhibitor) with  
 634 pipetting up and down several times. 0.1 unit of MNase (Sigma, Cat N3755) was added for chromatin digestion at  
 635 37°C for 5 min. The reaction was then terminated by adding 1  $\mu$ l 0.5 M EGTA. IP sample was incubated with 1  $\mu$ g  
 636 H3K4me<sub>3</sub> antibody (in-house) (89) and 2  $\mu$ g H3K27me<sub>3</sub> antibody (Active Motif, Cat 61017) overnight with  
 637 rotation at 4°C. In the next day, the sample was incubated with 300  $\mu$ g protein A or protein G dynabeads (Life  
 638 technologies, Cat 10001D or 10003D) for 2hrs with rotation at 4°C. The beads were washed 5 times in 150  $\mu$ l RIPA  
 639 buffer and once in 150  $\mu$ l LiCl buffer. After washing, tubes were spun briefly and the supernatant was removed. For  
 640 each IP sample, beads were resuspended with 27  $\mu$ l ddH<sub>2</sub>O and 1  $\mu$ l 10 $\times$  Ex-Taq buffer (TaKaRa). 1  $\mu$ l proteinase  
 641 K (Roche, Cat 10910000) was then added and the mix was incubated at 55°C for 90 min to elute DNA from beads.  
 642 The supernatant was then transferred to a new tube and the proteinase K was inactivated at 72°C for 40 min. 1  $\mu$ l  
 643 rSAP (NEB, Cat M0371) was then added to dephosphorylate 3' end of DNA at 37°C for 1hr. rSAP was inactivated  
 644 at 65°C for 10 min. The resulting sample was subjected to TELP library preparation as previously described (87).  
 645 The amplified DNA was size-selected using AMPure Beads for 200-800 bp DNA fragments. All libraries were  
 646 sequenced by Illumina Hi-Seq 1500 or 2500 or XTen platform according to manufacturer's instruction.

## 647 ATAC-seq library preparation and sequencing



The miniATAC-seq procedure was performed as previously described (71) with modifications to adapt it for zebrafish embryos. Briefly, dispersed cells from deyolked zebrafish embryos were transferred into 6 µl lysis buffer (10 mM Tris-HCl, pH = 7.4; 10 mM NaCl; 3 mM MgCl<sub>2</sub>; and 0.02% digitonin) in ice for 10 min. The ATAC reaction was performed by adding 4 µl ddH<sub>2</sub>O, 4 µl 5 X TTBL, and 5 µl TTE mix V5 (Vazyme, Cat TD502) at 37°C for 30 min, then stopped by adding 5 µl 5 X TS stop buffer at room temperature for 5 min. DNA was extracted by phenol chloroform and ethanol purification after adding 40 ng carrier RNA and 103 µl Tris-EDTA. Then DNA was PCR amplified with 10 µl index (Vayzme, Cat TD202), 10 µl 5 X TAB and 1 µl TAE (Vayzme, Cat TD502), with the program of 72°C for 3 min, 98°C for 30s, (98°C for 15s, 60°C for 30s, and 72°C for 3min) with 18 cycles, and 72°C for 5 min. The amplified DNA was size-selected using AMPure Beads for 200-800 bp DNA fragments. All libraries were sequenced by Illumina Hi-Seq 1500 or 2500 or XTen platform according to manufacturer's instruction.

## STEM-seq data processing

All STEM-seq datasets were mapped to the danRer7 reference genome by Bismark (90). Reads were trimmed with cutadaptor (91) using parameters: --minimum-length 20 --pair-filter=any. Alignments were performed with the following parameters: -N 1 -X 600 --score\_min L,0,-0.6. Multi-mapped reads and PCR duplicates were removed. The function bismark\_methylation\_extractor was used to calculate the DNA methylation level.

## Total RNA-seq data processing

The total RNA-seq data were firstly processed using Trim Galore! with default parameters to trim the adapter-containing and low-quality reads. The filtered data were then mapped to the zebrafish reference genome (danRer7) by STAR (version: STAR\_2.5.3a\_modified) (92) with the following parameters: --outSAMstrandField intronMotif --outSAMattributes All --outSAMunmapped Within --outSAMattrIHstart 0 --outWigStrand Stranded --outFilterMultimapNmax 20 --twopassMode Basic. The gene expression level was normalized to fragments per kilobase of transcript per million mapped (FPKM) values using Cufflinks (version 2.2.1) (93).

## Single-cell RNA-seq data processing

The scRNA-seq data were processed with Cell Ranger 3.1 for genome alignment (danRer10) and transcript counting. Next, the raw count matrices were imported to Seurat 3.0 for identification of cell subtypes. To filter low-quality cells, cells with unique detected genes lower than 2,000 and higher than 6,000 genes were discarded, and cells with high percentages of mitochondrial genes (>5%) were removed too. To make data comparable between cells and samples, we performed SCTransform normalization for each dataset independently. To further eliminate the effects caused by sequencing depths and percentages of mitochondrial genes, UMI variance and percent.mt were regressed out from SCTransform normalized data with regularized negative binomial model and linear model respectively. Samples of dome and shield stages were integrated by identifying anchors with the top 3,000 gene features. During the integration, the control cells were set as reference. Dimensional reduction was performed on the integrated data with PCA and then the first 30 PCs were selected for cluster identification and UMAP visualization.

Positive marker genes for each single cell subtype were identified as following: the expression of a gene is detected in at least 25% of cells of current cell subtype, and its expression is higher than the average expression levels of the rest cells (average log (fold change)>0.25, FDR<0.01).

## Cellular trajectory analysis

To better study the major differentiation lineages, we removed identified apoptotic cells, EVL, YSL, and PGC cells

which are more distally related lineages. Raw count matrices were imported to Monocle 2 and the lists of differentially expressed genes in each cluster identified through Seurat were used for the construction of cell trajectory. The root of each trajectory was defined by epiblast cells.

## CUT&RUN, ChIP-seq and ATAC-seq data processing

All reads were aligned to the zebrafish reference genome (danRer7) using Bowtie2 (version 2.2.2) (94) with the parameters  $-t -q -N 1 -L 25$ . All unmapped reads, non-uniquely mapped reads and PCR duplicates were removed. For downstream analysis, the read counts were normalized by computing the numbers of reads per kilobase of bin per million of reads sequenced (RPKM). To minimize the batch and cell type variation, RPKM values across whole genome were further Z-score normalized. To visualize the signals in the UCSC genome browser, each read was extended by 250 bp and the coverage for each base was counted.

## Differential gene expression analysis

Read counts of genes were summarized with featureCounts. Next, the read count matrices were imported to DESeq2 to perform differential expression analysis for genes in control and *dnmt1* mKD embryos. Genes with  $FDR < 0.01$  and  $\log_2(\text{fold change}) > 2$  were considered as significantly differentially expressed genes.

## Analysis of maternal, dome-specific and shield-specific genes

The maternal genes were identified by high expression level in oocyte ( $FPKM > 10$ ), but low at post-ZGA stages (fold change of dome/oocyte  $< 0.5$ ). Dome-specific expressed genes were defined by low expression in oocyte and the 256-cell stage ( $FPKM < 5$ ), and high expression at dome stage ( $FPKM > 10$ ). Similarly, shield-specific genes were defined with low expression levels in oocyte, embryos at the 256-cell and dome stages ( $FPKM < 5$ ), and high expression at shield stage ( $FPKM > 10$ ).

## Analysis of non-maternal ZGA genes

Due to the possible confounding effects from maternally inherited RNA transcripts, non-maternal ZGA genes were defined as low expression level in oocyte and the 256-cell stage ( $FPKM < 5$ ), but high expression level at dome stage ( $FPKM \text{ of dome} > 5$  and fold change of dome/256-cell  $> 2$ ).

## Gene ontology analysis

Functional annotation was performed using the Database for Annotation, Visualization and Integrated Discovery (DAVID) bioinformatics resource (95). Gene ontology terms for each functional cluster were summarized to a representative term, and P values were plotted to show the significance.

## Identification of CUT&RUN, ChIP-seq and ATAC-seq peaks

Peaks were called using MACS2 (96) with the parameters  $-p 1e-5 --nomodel -g 1.3e10$ . The called peaks with weak signals were filtered in the further analysis. Where appropriate, a random set of peaks with identical lengths were used as controls.

## Identification of putative enhancers

For adult enhancers, H3K27ac data were used to identify active enhancers, and ATAC-seq and DNA methylation

data were used to identify decommissioned enhancers (17). In order to ensure the consistency of data processing, the H3K27ac, ATAC-seq and DNA methylation data collected from previous study (56) were reanalyzed with our pipelines as described above. The lowly methylated regions (LMRs) were obtained from the same study (56).

To define active enhancers, H3K27ac peaks at least +/- 2 kb away from annotated promoters were firstly selected as candidate enhancers. To exclude possible unannotated promoters, any H3K27ac sites that overlap with H3K4me3 peaks of adult tissues (56) were also excluded. Furthermore, to exclude possible unannotated promoters in embryos, we took advantage of the notion that hypomethylated regions often mark promoters in zebrafish (97) and enhancers are hypermethylated in zebrafish early embryos, leaving only promoters unmethylated (29). Therefore, we chose the 256-cell stage as a representative stage when enhancer dememorization is completed. All UMR/LMRs (29) at the 256-cell stage of WT embryos are merged together and identified as possible promoters, and were further excluded from the enhancer lists to generate the final putative enhancer lists.

### TF motif identification at enhancers

The findMotifsGenome.pl script from HOMER program (98) was used to identify the enriched motifs at enhancers. TFs expressed at least at one stage with motif enrichment *p*-value less than 1e-20 were included.

### Identification of lost, ectopic and retained histone mark peaks

We clustered H3K4me3, H3K27me3 or H2AK119ub peaks and categorized them into lost, ectopic and retained groups based on the following cut-offs. The lost peaks were identified with log2(fold change) <-2, normalized RPKM<-1 in mKD embryonic cells; the ectopic peaks were defined by log2(fold change)>2, normalized RPKM>1 in mKD embryonic cells; the retained peaks were defined by log2(fold change) <2, normalized RPKM>0.5 in both control and mKD samples.

### Distance calculation for ectopic distal H3K4me3 peaks and DEGs

We calculated the distances from the TSSs of upregulated, downregulated or non-differentially expressed genes (non-DEGs) to the center of distal ectopic H3K4me3 peaks. Statistical significance between groups was estimated with Mann Whitney U Test.

### Quantification and Statistical analysis

At least two biological replicates were used for RNA-seq, scRNA-seq, CUT&RUN, STAR-ChIP, and ATAC-seq experiments. The reproducibility between replicates were estimated with Pearson correlation. All box plots were plotted using R and Python. In box plots, the horizontal line shows the median, the box encompasses the interquartile range, and whiskers extend to 5th and 95th percentiles. Statistical significance for the enrichment of *dnmt1* mKD embryos upregulated genes in adult tissue expressed genes was assessed with one-sided Fisher's exact test.

## References

1. A. Bird, DNA methylation patterns and epigenetic memory. *Genes Dev.* **16** (2002), pp. 6–21.
2. H. Cedar, Y. Bergman, Programming of DNA methylation patterns. *Annu. Rev. Biochem.* **81**, 97–117 (2012).
3. P. A. Jones, Functions of DNA methylation: Islands, start sites, gene bodies and beyond. *Nat. Rev. Genet.* **13** (2012), pp. 484–492.

- 755 4. C. Luo, P. Hajkova, J. R. Ecker, Dynamic DNA methylation: In the right place at the right time. *Science* (80-. ).  
756 **361**, 1336–1340 (2018).
- 757 5. M. Okano, D. W. Bell, D. A. Haber, E. Li, DNA methyltransferases Dnmt3a and Dnmt3b are essential for de  
758 novo methylation and mammalian development. *Cell*. **99**, 247–257 (1999).
- 759 6. M. G. Goll, T. H. Bestor, Eukaryotic cytosine methyltransferases. *Annu. Rev. Biochem.* **74**, 481–514 (2005).
- 760 7. X. Wu, Y. Zhang, TET-mediated active DNA demethylation: Mechanism, function and beyond. *Nat. Rev.*  
761 *Genet.* (2017), pp. 517–534.
- 762 8. W. A. Pastor, L. Aravind, A. Rao, TETonic shift: Biological roles of TET proteins in DNA demethylation and  
763 transcription. *Nat. Rev. Mol. Cell Biol.* (2013), pp. 341–356.
- 764 9. H. Q. Dai, B. A. Wang, L. Yang, J. J. Chen, G. C. Zhu, M. L. Sun, H. Ge, R. Wang, D. L. Chapman, F. Tang,  
765 X. Sun, G. L. Xu, TET-mediated DNA demethylation controls gastrulation by regulating Lefty-Nodal  
766 signalling. *Nature*. **538**, 528–532 (2016).
- 767 10. Z. Chen, Z. Chen, Z. Chen, Y. Zhang, Y. Zhang, Y. Zhang, Y. Zhang, Y. Zhang, Role of Mammalian DNA  
768 Methyltransferases in Development. *Annu. Rev. Biochem.* **89**, 135–158 (2020).
- 769 11. M. B. Stadler, R. Murr, L. Burger, R. Ivanek, F. Lienert, A. Schöler, C. Wirbelauer, E. J. Oakeley, D. Gaidatzis,  
770 V. K. Tiwari, D. Schübeler, DNA-binding factors shape the mouse methylome at distal regulatory regions.  
771 *Nature*. **480**, 490–495 (2011).
- 772 12. W. Xie, M. D. Schultz, R. Lister, Z. Hou, N. Rajagopal, P. Ray, J. W. Whitaker, S. Tian, R. D. Hawkins, D.  
773 Leung, H. Yang, T. Wang, A. Y. Lee, S. A. Swanson, J. Zhang, Y. Zhu, A. Kim, J. R. Nery, M. A. Urich, S.  
774 Kuan, C. A. Yen, S. Klugman, P. Yu, K. Suknuntha, N. E. Propson, H. Chen, L. E. Edsall, U. Wagner, Y. Li, Z.  
775 Ye, A. Kulkarni, Z. Xuan, W. Y. Chung, N. C. Chi, J. E. Antosiewicz-Bourget, I. Slukvin, R. Stewart, M. Q.  
776 Zhang, W. Wang, J. A. Thomson, J. R. Ecker, B. Ren, Epigenomic analysis of multilineage differentiation of  
777 human embryonic stem cells. *Cell*. **153**, 1134–1148 (2013).
- 778 13. C. A. Gifford, M. J. Ziller, H. Gu, C. Trapnell, J. Donaghey, A. Tsankov, A. K. Shalek, D. R. Kelley, A. A.  
779 Shishkin, R. Issner, X. Zhang, M. Coyne, J. L. Fostel, L. Holmes, J. Meldrim, M. Guttman, C. Epstein, H. Park,  
780 O. Kohlbacher, J. Rinn, A. Gnirke, E. S. Lander, B. E. Bernstein, A. Meissner, Transcriptional and epigenetic  
781 dynamics during specification of human embryonic stem cells. *Cell*. **153**, 1149–1163 (2013).
- 782 14. Z. D. Smith, A. Meissner, DNA methylation: Roles in mammalian development. *Nat. Rev. Genet.* **14** (2013),  
783 pp. 204–220.
- 784 15. Y. Song, P. R. van den Berg, S. Markoulaki, F. Soldner, A. Dall’Agnese, J. E. Henninger, J. Drotar, N.  
785 Rosenau, M. A. Cohen, R. A. Young, S. Semrau, Y. Stelzer, R. Jaenisch, Dynamic Enhancer DNA Methylation  
786 as Basis for Transcriptional and Cellular Heterogeneity of ESCs. *Mol. Cell*. **75**, 905-920.e6 (2019).
- 787 16. G. C. Hon, N. Rajagopal, Y. Shen, D. F. McCleary, F. Yue, M. D. Dang, B. Ren, Epigenetic memory at  
788 embryonic enhancers identified in DNA methylation maps from adult mouse tissues. *Nat. Genet.* **45**, 1198–  
789 1206 (2013).
- 790 17. U. Jadhav, A. Cavazza, K. K. Banerjee, H. Xie, N. K. O’Neill, V. Saenz-Vash, Z. Herbert, S. Madha, S. H.  
791 Orkin, H. Zhai, R. A. Shivdasani, Extensive Recovery of Embryonic Enhancer and Gene Memory Stored in  
792 Hypomethylated Enhancer DNA. *Mol. Cell*. **74**, 542-554.e5 (2019).
- 793 18. M. A. Eckersley-Maslin, C. Alda-Catalinas, W. Reik, Dynamics of the epigenetic landscape during the  
794 maternal-to-zygotic transition. *Nat. Rev. Mol. Cell Biol.* **19** (2018), pp. 436–450.
- 795 19. H. Wu, Y. Zhang, Reversing DNA methylation: Mechanisms, genomics, and biological functions. *Cell* (2014),  
796 pp. 45–68.
- 797 20. K. Skvortsova, N. Iovino, O. Bogdanović, Functions and mechanisms of epigenetic inheritance in animals. *Nat.*  
798 *Rev. Mol. Cell Biol.* **19** (2018), pp. 774–790.
- 799 21. M. A. M. Cleaton, C. A. Edwards, A. C. Ferguson-Smith, Phenotypic Outcomes of Imprinted Gene Models in  
800 Mice: Elucidation of Pre- and Postnatal Functions of Imprinted Genes. *Annu. Rev. Genomics Hum. Genet.* **15**,

- 801 93–126 (2014).
- 802 22. D. Macleod, V. H. Clark, A. Bird, Absence of genome-wide changes in DNA methylation during development  
803 of the zebrafish. *Nat. Genet.* (1999), pp. 139–140.
- 804 23. G. J. C. Veenstra, A. P. Wolffe, Constitutive genomic methylation during embryonic development of *Xenopus*.  
805 *Biochim. Biophys. Acta - Gene Struct. Expr.* **1**, 39–44 (2001).
- 806 24. L. Jiang, J. Zhang, J. J. Wang, L. Wang, L. Zhang, G. Li, X. Yang, X. Ma, X. Sun, J. Cai, J. Zhang, X. Huang,  
807 M. Yu, X. Wang, F. Liu, C. I. Wu, C. He, B. Zhang, W. Ci, J. Liu, Sperm, but not oocyte, DNA methylome is  
808 inherited by zebrafish early embryos. *Cell*. **153**, 773–784 (2013).
- 809 25. M. E. Potok, D. A. Nix, T. J. Parnell, B. R. Cairns, Reprogramming the maternal zebrafish genome after  
810 fertilization to match the paternal methylation pattern. *Cell*. **153**, 759–772 (2013).
- 811 26. R. C. Akkers, S. J. van Heeringen, U. G. Jacobi, E. M. Janssen-Megens, K. J. François, H. G. Stunnenberg, G.  
812 J. C. Veenstra, A Hierarchy of H3K4me3 and H3K27me3 Acquisition in Spatial Gene Regulation in *Xenopus*  
813 Embryos. *Dev. Cell*. **17**, 425–434 (2009).
- 814 27. P. J. Murphy, S. F. Wu, C. R. James, C. L. Wike, B. R. Cairns, Placeholder Nucleosomes Underlie Germline-  
815 to-Embryo DNA Methylation Reprogramming. *Cell*. **172**, 993–1006.e13 (2018).
- 816 28. N. L. Vastenhouw, A. F. Schier, Bivalent histone modifications in early embryogenesis. *Curr. Opin. Cell Biol.*  
817 **24**, 374–386 (2012).
- 818 29. B. Zhang, X. Wu, W. Zhang, W. Shen, Q. Sun, K. Liu, Y. Zhang, Q. Wang, Y. Li, A. Meng, W. Xie,  
819 Widespread Enhancer Dememorization and Promoter Priming during Parental-to-Zygotic Transition. *Mol. Cell*.  
820 **72**, 673–686.e6 (2018).
- 821 30. K. C. Sadler, K. N. Krahn, N. A. Gaur, C. Ukomadu, Liver growth in the embryo and during liver regeneration  
822 in zebrafish requires the cell cycle regulator, *uhrf1*. *Proc. Natl. Acad. Sci. U. S. A.* **104**, 1570–1575 (2007).
- 823 31. R. M. Anderson, J. A. Bosch, M. G. Goll, D. Hesselson, P. D. S. Dong, D. Shin, N. C. Chi, C. H. Shin, A.  
824 Schlegel, M. Halpern, D. Y. R. Stainier, Loss of *Dnmt1* catalytic activity reveals multiple roles for DNA  
825 methylation during pancreas development and regeneration. *Dev. Biol.* **334**, 213–223 (2009).
- 826 32. C. B. Kimmel, W. W. Ballard, S. R. Kimmel, B. Ullmann, T. F. Schilling, Stages of embryonic development of  
827 the zebrafish. *Dev. Dyn.* **203**, 253–310 (1995).
- 828 33. R. K. Tittle, R. Sze, A. Ng, R. J. Nuckels, M. E. Swartz, R. M. Anderson, J. Bosch, D. Y. R. Stainier, J. K.  
829 Eberhart, J. M. Gross, *Uhrf1* and *Dnmt1* are required for development and maintenance of the zebrafish lens.  
830 *Dev. Biol.* **350**, 50–63 (2011).
- 831 34. J. Chu, E. A. Loughlin, N. A. Gaur, S. SenBanerjee, V. Jacob, C. Monson, B. Kent, A. Oranu, Y. Ding, C.  
832 Ukomadu, K. C. Sadler, *UHRF1* phosphorylation by cyclin A2/cyclin-dependent kinase 2 is required for  
833 zebrafish embryogenesis. *Mol. Biol. Cell*. **23**, 59–70 (2012).
- 834 35. Y. Li, Z. Zhang, J. Chen, W. Liu, W. Lai, B. Liu, X. Li, L. Liu, S. Xu, Q. Dong, M. Wang, X. Duan, J. Tan, Y.  
835 Zheng, P. Zhang, G. Fan, J. Wong, G. L. Xu, Z. Wang, H. Wang, S. Gao, B. Zhu, Stella safeguards the oocyte  
836 methylome by preventing de novo methylation mediated by *DNMT1*. *Nature*. **564** (2018), pp. 136–140.
- 837 36. T. Nakamura, Y. Arai, H. Umehara, M. Masuhara, T. Kimura, H. Taniguchi, T. Sekimoto, M. Ikawa, Y.  
838 Yoneda, M. Okabe, S. Tanaka, K. Shiota, T. Nakano, *PGC7/Stella* protects against DNA demethylation in early  
839 embryogenesis. *Nat. Cell Biol.* **9**, 64–71 (2007).
- 840 37. C. B. Mulholland, A. Nishiyama, J. Ryan, R. Nakamura, M. Yigit, I. M. Glück, C. Trummer, W. Qin, M. D.  
841 Bartoschek, F. R. Traube, E. Parsa, E. Ugur, M. Modic, A. Acharya, P. Stolz, C. Ziegenhain, M. Wierer, W.  
842 Enard, T. Carell, D. C. Lamb, H. Takeda, M. Nakanashi, S. Bultmann, H. Leonhardt, Recent evolution of a  
843 TET-controlled and *DPPA3/STELLA*-driven pathway of passive DNA demethylation in mammals. *Nat.*  
844 *Commun.* **11**, 5972 (2020).
- 845 38. B. Kent, E. Magnani, M. J. Walsh, K. C. Sadler, *UHRF1* regulation of *Dnmt1* is required for pre-gastrula  
846 zebrafish development. *Dev. Biol.* **412**, 99–113 (2016).



- 847 39. O. Bogdanović, A. H. Smits, E. De La Calle Mustienes, J. J. Tena, E. Ford, R. Williams, U. Senanayake, M. D.  
848 Schultz, S. Hontelez, I. Van Kruijsbergen, T. Rayon, F. Gnerlich, T. Carell, G. J. C. Veenstra, M. Manzaneres,  
849 T. Sauka-Spengler, J. R. Ecker, M. Vermeulen, J. L. Gómez-Skarmeta, R. Lister, Active DNA demethylation at  
850 enhancers during the vertebrate phylotypic period. *Nat. Genet.* **48**, 417–426 (2016).
- 851 40. R. D. Almeida, M. Loose, V. Sottile, E. Matsa, C. Denning, L. Young, A. D. Johnson, M. Gering, A. Ruzov, 5-  
852 Hydroxymethyl-Cytosine Enrichment of Non-Committed Cells Is Not a Universal Feature of Vertebrate  
853 Development. *Epigenetics*. **7**, 383–389 (2012).
- 854 41. L. J. T. Kaaij, M. Mokry, M. Zhou, M. Musheev, G. Geeven, A. S. J. Melquiond, A. M. de Jesus Domingues,  
855 W. de Laat, C. Niehrs, A. D. Smith, R. F. Ketting, Enhancers reside in a unique epigenetic environment during  
856 early zebrafish development. *Genome Biol.* **17**, 1–15 (2016).
- 857 42. X. Wu, W. Shen, B. Zhang, A. Meng, The genetic program of oocytes can be modified in vivo in the zebrafish  
858 ovary. *J. Mol. Cell Biol.* **10**, 479–493 (2018).
- 859 43. Y. Zhang, Y. Xiang, Q. Yin, Z. Du, X. Peng, Q. Wang, M. Fidalgo, W. Xia, Y. Li, Z. A. Zhao, W. Zhang, J.  
860 Ma, F. Xu, J. Wang, L. Li, W. Xie, Dynamic epigenomic landscapes during early lineage specification in mouse  
861 embryos. *Nat. Genet.* **50**, 96–105 (2018).
- 862 44. Y. G. Langdon, M. C. Mullins, Maternal and Zygotic Control of Zebrafish Dorsoventral Axial Patterning.  
863 *Annu. Rev. Genet.* **45**, 357–377 (2011).
- 864 45. A. F. Schier, W. S. Talbot, Molecular Genetics of Axis Formation in Zebrafish. *Annu. Rev. Genet.* **39**, 561–613  
865 (2005).
- 866 46. T. Stuart, A. Butler, P. Hoffman, C. Hafemeister, E. Papalexi, W. M. Mauck, Y. Hao, M. Stoeckius, P. Smibert,  
867 R. Satija, Comprehensive Integration of Single-Cell Data. *Cell*. **177**, 1888-1902.e21 (2019).
- 868 47. C. Trapnell, D. Cacchiarelli, J. Grimsby, P. Pokharel, S. Li, M. Morse, N. J. Lennon, K. J. Livak, T. S.  
869 Mikkelsen, J. L. Rinn, The dynamics and regulators of cell fate decisions are revealed by pseudotemporal  
870 ordering of single cells. *Nat. Biotechnol.* **32**, 381–386 (2014).
- 871 48. J. A. Farrell, Y. Wang, S. J. Riesenfeld, K. Shekhar, A. Regev, A. F. Schier, Single-cell reconstruction of  
872 developmental trajectories during zebrafish embryogenesis. *Science (80-. )*. **360** (2018),  
873 doi:10.1126/science.aar3131.
- 874 49. D. E. Wagner, C. Weinreb, Z. M. Collins, J. A. Briggs, S. G. Megason, A. M. Klein, Single-cell mapping of  
875 gene expression landscapes and lineage in the zebrafish embryo. *Science (80-. )*. **360**, 981–987 (2018).
- 876 50. Y. Chernyavskaya, R. Mudbhary, C. Zhang, D. Tokarz, V. Jacob, S. Gopinath, X. Sun, S. Wang, E. Magnani,  
877 B. P. Madakashira, J. A. Yoder, Y. Hoshida, K. C. Sadler, Loss of dna methylation in zebrafish embryos  
878 activates retrotransposons to trigger antiviral signaling. *Development*. **144**, 2925–2939 (2017).
- 879 51. J. M. Parant, S. A. George, J. A. Holden, H. J. Yost, Genetic modeling of Li-Fraumeni syndrome in zebrafish.  
880 *DMM Dis. Model. Mech.* **3**, 45–56 (2010).
- 881 52. X. Huang, Z. Darzynkiewicz, Cytometric assessment of histone H2AX phosphorylation: a reporter of DNA  
882 damage. *Methods Mol. Biol.* **314**, 73–80 (2006).
- 883 53. A. K. Vashishtha, R. D. Kuchta, Effects of Acyclovir, Foscarnet, and Ribonucleotides on Herpes Simplex  
884 Virus-1 DNA Polymerase: Mechanistic Insights and a Novel Mechanism for Preventing Stable Incorporation of  
885 Ribonucleotides into DNA. *Biochemistry*. **55**, 1168–1177 (2016).
- 886 54. X. Ma, E. Helgason, Q. T. Phung, C. L. Quan, R. S. Iyer, M. W. Lee, K. K. Bowman, M. A. Starovasnik, E. C.  
887 Dueber, Molecular basis of Tank-binding kinase 1 activation by transautophosphorylation. *Proc. Natl. Acad.*  
888 *Sci. U. S. A.* **109**, 9378–9383 (2012).
- 889 55. K. Skvortsova, K. Tarbashevich, M. Stehling, R. Lister, M. Irimia, E. Raz, O. Bogdanovic, Retention of  
890 paternal DNA methylome in the developing zebrafish germline. *Nat. Commun.* **10**, 1–13 (2019).
- 891 56. H. Yang, Y. Luan, T. Liu, H. J. Lee, L. Fang, Y. Wang, X. Wang, B. Zhang, Q. Jin, K. C. Ang, X. Xing, J.  
892 Wang, J. Xu, F. Song, I. Sriranga, C. Khunsriraksakul, T. Salameh, D. Li, M. N. K. Choudhary, J. Topczewski,

- K. Wang, G. S. Gerhard, R. C. Hardison, T. Wang, K. C. Cheng, F. Yue, A map of cis-regulatory elements and 3D genome structures in zebrafish. *Nature*. **588**, 337–343 (2020).
57. N. L. Vastenhouw, Y. Zhang, I. G. Woods, F. Imam, A. Regev, X. S. Liu, J. Rinn, A. F. Schier, Chromatin signature of embryonic pluripotency is established during genome activation. *Nature*. **464**, 922–926 (2010).
58. L. C. Lindeman, I. S. Andersen, A. H. Reiner, N. Li, H. Aanes, O. Østrup, C. Winata, S. Mathavan, F. Müller, P. Aleström, P. Collas, Prepatterning of Developmental Gene Expression by Modified Histones before Zygotic Genome Activation. *Dev. Cell*. **21**, 993–1004 (2011).
59. G. J. Hickey, C. Wike, X. Nie, Y. Guo, M. Tan, B. R. Cairns, Establishment of Developmental Gene Silencing by Ordered Polycomb Complex Recruitment in Early Zebrafish Embryos. *bioRxiv* (2021).
60. R. Margueron, D. Reinberg, The Polycomb complex PRC2 and its mark in life. *Nature*. **469**, 343–349 (2011).
61. P. J. Skene, S. Henikoff, An efficient targeted nuclease strategy for high-resolution mapping of DNA binding sites. *Elife*. **6**, e21856 (2017).
62. A. Laugesen, J. W. Højfeldt, K. Helin, Molecular Mechanisms Directing PRC2 Recruitment and H3K27 Methylation. *Mol. Cell* (2019), pp. 8–18.
63. J. P. Reddington, S. M. Perricone, C. E. Nestor, J. Reichmann, N. A. Youngson, M. Suzuki, D. Reinhardt, D. S. Dunican, J. G. Prendergast, H. Mjoseng, B. H. Ramsahoye, E. Whitelaw, J. M. Greally, I. R. Adams, W. A. Bickmore, R. R. Meehan, Redistribution of H3K27me3 upon DNA hypomethylation results in de-repression of Polycomb target genes. *Genome Biol.* **14**, R25 (2013).
64. J. A. Hagarman, M. P. Motley, K. Kristjansdottir, P. D. Soloway, Coordinate Regulation of DNA Methylation and H3K27me3 in Mouse Embryonic Stem Cells. *PLoS One*. **8**, e53380 (2013).
65. Y. Li, H. Zheng, Q. Wang, C. Zhou, L. Wei, X. Liu, W. Zhang, Y. Zhang, Z. Du, X. Wang, W. Xie, Genome-wide analyses reveal a role of Polycomb in promoting hypomethylation of DNA methylation valleys. *Genome Biol.* **19**, 18 (2018).
66. T. Bartke, M. Vermeulen, B. Xhemalce, S. C. Robson, M. Mann, T. Kouzarides, Nucleosome-interacting proteins regulated by DNA and histone methylation. *Cell*. **143**, 470–484 (2010).
67. H. Wu, V. Coskun, J. Tao, W. Xie, W. Ge, K. Yoshikawa, E. Li, Y. Zhang, Y. E. Sun, Dnmt3a-dependent nonpromoter DNA methylation facilitates transcription of neurogenic genes. *Science (80-. )*. **329**, 444–448 (2010).
68. A. B. Brinkman, H. Gu, S. J. J. Bartels, Y. Zhang, F. Matarese, F. Simmer, H. Marks, C. Bock, A. Gnirke, A. Meissner, H. G. Stunnenberg, Sequential ChIP-bisulfite sequencing enables direct genome-scale investigation of chromatin and DNA methylation cross-talk. *Genome Res.* **22**, 1128–1138 (2012).
69. E. Calo, J. Wysocka, Modification of Enhancer Chromatin: What, How, and Why? *Mol. Cell*. **49**, 825–837 (2013).
70. J. D. Buenrostro, P. G. Giresi, L. C. Zaba, H. Y. Chang, W. J. Greenleaf, Transposition of native chromatin for fast and sensitive epigenomic profiling of open chromatin, DNA-binding proteins and nucleosome position. *Nat. Methods*. **10**, 1213–1218 (2013).
71. J. Wu, J. Xu, B. Liu, G. Yao, P. Wang, Z. Lin, B. Huang, X. Wang, T. Li, S. Shi, N. Zhang, F. Duan, J. Ming, X. Zhang, W. Niu, W. Song, H. Jin, Y. Guo, S. Dai, L. Hu, L. Fang, Q. Wang, Y. Li, W. Li, J. Na, W. Xie, Y. Sun, Chromatin analysis in human early development reveals epigenetic transition during ZGA. *Nature*. **557**, 256–259 (2018).
72. M. P. Creighton, A. W. Cheng, G. G. Welstead, T. Kooistra, B. W. Carey, E. J. Steine, J. Hanna, M. A. Lodato, G. M. Frampton, P. A. Sharp, L. A. Boyer, R. A. Young, R. Jaenisch, Histone H3K27ac separates active from poised enhancers and predicts developmental state. *Proc. Natl. Acad. Sci. U. S. A.* **107**, 21931–21936 (2010).
73. D. Schübeler, Function and information content of DNA methylation. *Nature*. **517** (2015), pp. 321–326.
74. M. T. Lee, A. R. Bonneau, C. M. Takacs, A. A. Bazzini, K. R. Divito, E. S. Fleming, A. J. Giraldez, Nanog, Pou5f1 and SoxB1 activate zygotic gene expression during the maternal-to-zygotic transition. *Nature*. **503**,



360–364 (2013).

75. Y. Okuda, E. Ogura, H. Kondoh, Y. Kamachi, B1 SOX coordinate cell specification with patterning and morphogenesis in the early zebrafish embryo. *PLoS Genet.* **6**, 36 (2010).

76. Y. Okuda, H. Yoda, M. Uchikawa, M. Furutani-Seiki, H. Takeda, H. Kondoh, Y. Kamachi, Comparative genomic and expression analysis of group B1 sox genes in zebrafish indicates their diversification during vertebrate evolution. *Dev. Dyn.* **235**, 811–825 (2006).

77. A. L. Hughes, J. R. Kelley, R. J. Klose, Understanding the interplay between CpG island-associated gene promoters and H3K4 methylation. *Biochim. Biophys. Acta - Gene Regul. Mech.* **1863**, 194567 (2020).

78. A. M. Deaton, A. Bird, CpG islands and the regulation of transcription. *Genes Dev.* **25**, 1010–1022 (2011).

79. F. Spitz, E. E. M. Furlong, Transcription factors: From enhancer binding to developmental control. *Nat. Rev. Genet.* (2012), pp. 613–626.

80. C. Y. McLean, D. Bristor, M. Hiller, S. L. Clarke, B. T. Schaar, C. B. Lowe, A. M. Wenger, G. Bejerano, GREAT improves functional interpretation of cis-regulatory regions. *Nat. Biotechnol.* **28**, 495–501 (2010).

81. W. Xia, W. Xie, Rebooting the Epigenomes during Mammalian Early Embryogenesis. *Stem Cell Reports.* **15**, 1158–1175 (2020).

82. A. Parry, S. Rulands, W. Reik, Active turnover of DNA methylation during cell fate decisions. *Nat. Rev. Genet.* **22**, 59–66 (2021).

83. S. Yuan, Z. Sun, Microinjection of mRNA and morpholino antisense oligonucleotides in zebrafish embryos. *J. Vis. Exp.* **27** (2009), doi:10.3791/1113.

84. K. Rai, L. D. Nadauld, S. Chidester, E. J. Manos, S. R. James, A. R. Karpf, B. R. Cairns, D. A. Jones, Zebra Fish Dnmt1 and Suv39h1 Regulate Organ-Specific Terminal Differentiation during Development. *Mol. Cell. Biol.* **26**, 7077–7085 (2006).

85. D. Wu, L. Chen, Q. Sun, X. Wu, S. Jia, A. Meng, Uracil-DNA glycosylase is involved in DNA demethylation and required for embryonic development in the zebrafish embryo. *J. Biol. Chem.* **289** (2014), doi:10.1074/jbc.M114.561019.

86. T. Yabu, S. Todoriki, M. Yamashita, Stress-induced apoptosis by heat shock, UV and  $\gamma$ -ray irradiation in zebrafish embryos detected by increased caspase activity and whole-mount TUNEL staining. *Fish. Sci.* **67**, 333–340 (2001).

87. X. Peng, J. Wu, R. Brunmeir, S. Y. Kim, Q. Zhang, C. Ding, W. Han, W. Xie, F. Xu, TELP, a sensitive and versatile library construction method for next-generation sequencing. *Nucleic Acids Res.* **43**, e35 (2015).

88. W. Xia, J. Xu, G. Yu, G. Yao, K. Xu, X. Ma, N. Zhang, B. Liu, T. Li, Z. Lin, X. Chen, L. Li, Q. Wang, D. Shi, S. Shi, Y. Zhang, W. Song, H. Jin, L. Hu, Z. Bu, Y. Wang, J. Na, W. Xie, Y. P. Sun, Resetting histone modifications during human parental-to-zygotic transition. *Science (80-. )*. **365**, 353–360 (2019).

89. B. Zhang, H. Zheng, B. Huang, W. Li, Y. Xiang, X. Peng, J. Ming, X. Wu, Y. Zhang, Q. Xu, W. Liu, X. Kou, Y. Zhao, W. He, C. Li, B. Chen, Y. Li, Q. Wang, J. Ma, Q. Yin, K. Kee, A. Meng, S. Gao, F. Xu, J. Na, W. Xie, Allelic reprogramming of the histone modification H3K4me3 in early mammalian development. *Nature.* **537**, 553–557 (2016).

90. F. Krueger, S. R. Andrews, Bismark: A flexible aligner and methylation caller for Bisulfite-Seq applications. *Bioinformatics.* **27**, 1571–1572 (2011).

91. M. Martin, Cutadapt removes adapter sequences from high-throughput sequencing reads. *EMBnet.journal.* **24**, 1138–1143 (2011).

92. A. Dobin, C. A. Davis, F. Schlesinger, J. Drenkow, C. Zaleski, S. Jha, P. Batut, M. Chaisson, T. R. Gingeras, STAR: Ultrafast universal RNA-seq aligner. *Bioinformatics.* **29**, 15–21 (2013).

93. C. Trapnell, A. Roberts, L. Goff, G. Pertea, D. Kim, D. R. Kelley, H. Pimentel, S. L. Salzberg, J. L. Rinn, L. Pachter, Differential gene and transcript expression analysis of RNA-seq experiments with TopHat and Cufflinks. *Nat. Protoc.* **7**, 562–578 (2012).

94. B. Langmead, S. L. Salzberg, Fast gapped-read alignment with Bowtie 2. *Nat. Methods*. **9**, 357–359 (2012).
95. G. Dennis, B. T. Sherman, D. A. Hosack, J. Yang, W. Gao, H. C. Lane, R. A. Lempicki, DAVID: Database for Annotation, Visualization, and Integrated Discovery. *Genome Biol.* **4**, R60 (2003).
96. Y. Zhang, T. Liu, C. A. Meyer, J. Eeckhoute, D. S. Johnson, B. E. Bernstein, C. Nussbaum, R. M. Myers, M. Brown, W. Li, X. S. Shirley, Model-based analysis of ChIP-Seq (MACS). *Genome Biol.* **9**, R137 (2008).
97. H. K. Long, D. Sims, A. Heger, N. P. Blackledge, C. Kutter, M. L. Wright, F. Grützner, D. T. Odom, R. Patient, C. P. Ponting, R. J. Klose, Epigenetic conservation at gene regulatory elements revealed by non-methylated DNA profiling in seven vertebrates. *Elife*. **2**, e00348 (2013).
98. S. Heinz, C. Benner, N. Spann, E. Bertolino, Y. C. Lin, P. Laslo, J. X. Cheng, C. Murre, H. Singh, C. K. Glass, Simple Combinations of Lineage-Determining Transcription Factors Prime cis-Regulatory Elements Required for Macrophage and B Cell Identities. *Mol. Cell*. **38**, 576–589 (2010).

## Acknowledgments

We appreciate comments from members of the Xie lab during preparation of the manuscript. We would like to express our gratitude to Dr. Sebastian Bultmann and Heinrich Leonhardt from Ludwig Maximilians University of Munich for sharing mouse Stella plasmid and discussion, Dr. Steven Henikoff from Fred Hutchinson Cancer Research Center for sharing pA-MNase and Dr. Qinghua Tao from Tsinghua University for providing the DNMT1 antibody. We are also grateful to the cell facility at the Tsinghua Center of Biomedical Analysis for assistance with imaging and the biocomputing facility at Tsinghua University.

## Funding:

National Key R&D Program of China 2016YFC0900300  
National Basic Research Program of China 2015CB856201  
National Natural Science Foundation of China 31422031 and 31725018  
THU-PKU Center for Life Sciences  
W.X. is a Howard Hughes Medical Institute international research scholar

## Author contributions:

X.W. collected zebrafish samples and conducted most zebrafish experiments with help from W.S. X.W. performed total RNA-seq, scRNA-seq, ATAC-seq, CUT&RUN experiments with the help from L. L. and W. Xia. and performed data analysis with the help from B. Z., H. Z., B. L. B. Z. performed STAR ChIP-seq and STEM-seq experiments with the help from Y. Z. and data analysis. H.Z. performed bulk RNA-seq and scRNA-seq data analyses. Q.W. helped with mouse Stella overexpression experiments. Xi. W. helped with data analysis. W. Xie. supervised the project or related experiments. X.W., B.Z., H.Z., and W. Xie. wrote the manuscript with help from all authors.

## Competing interests:

The authors declare no competing financial interests.

## Data and materials availability:

All data have been deposited to the Gene Expression Omnibus (GEO), and the accession number is GSE175951.

Figure 1

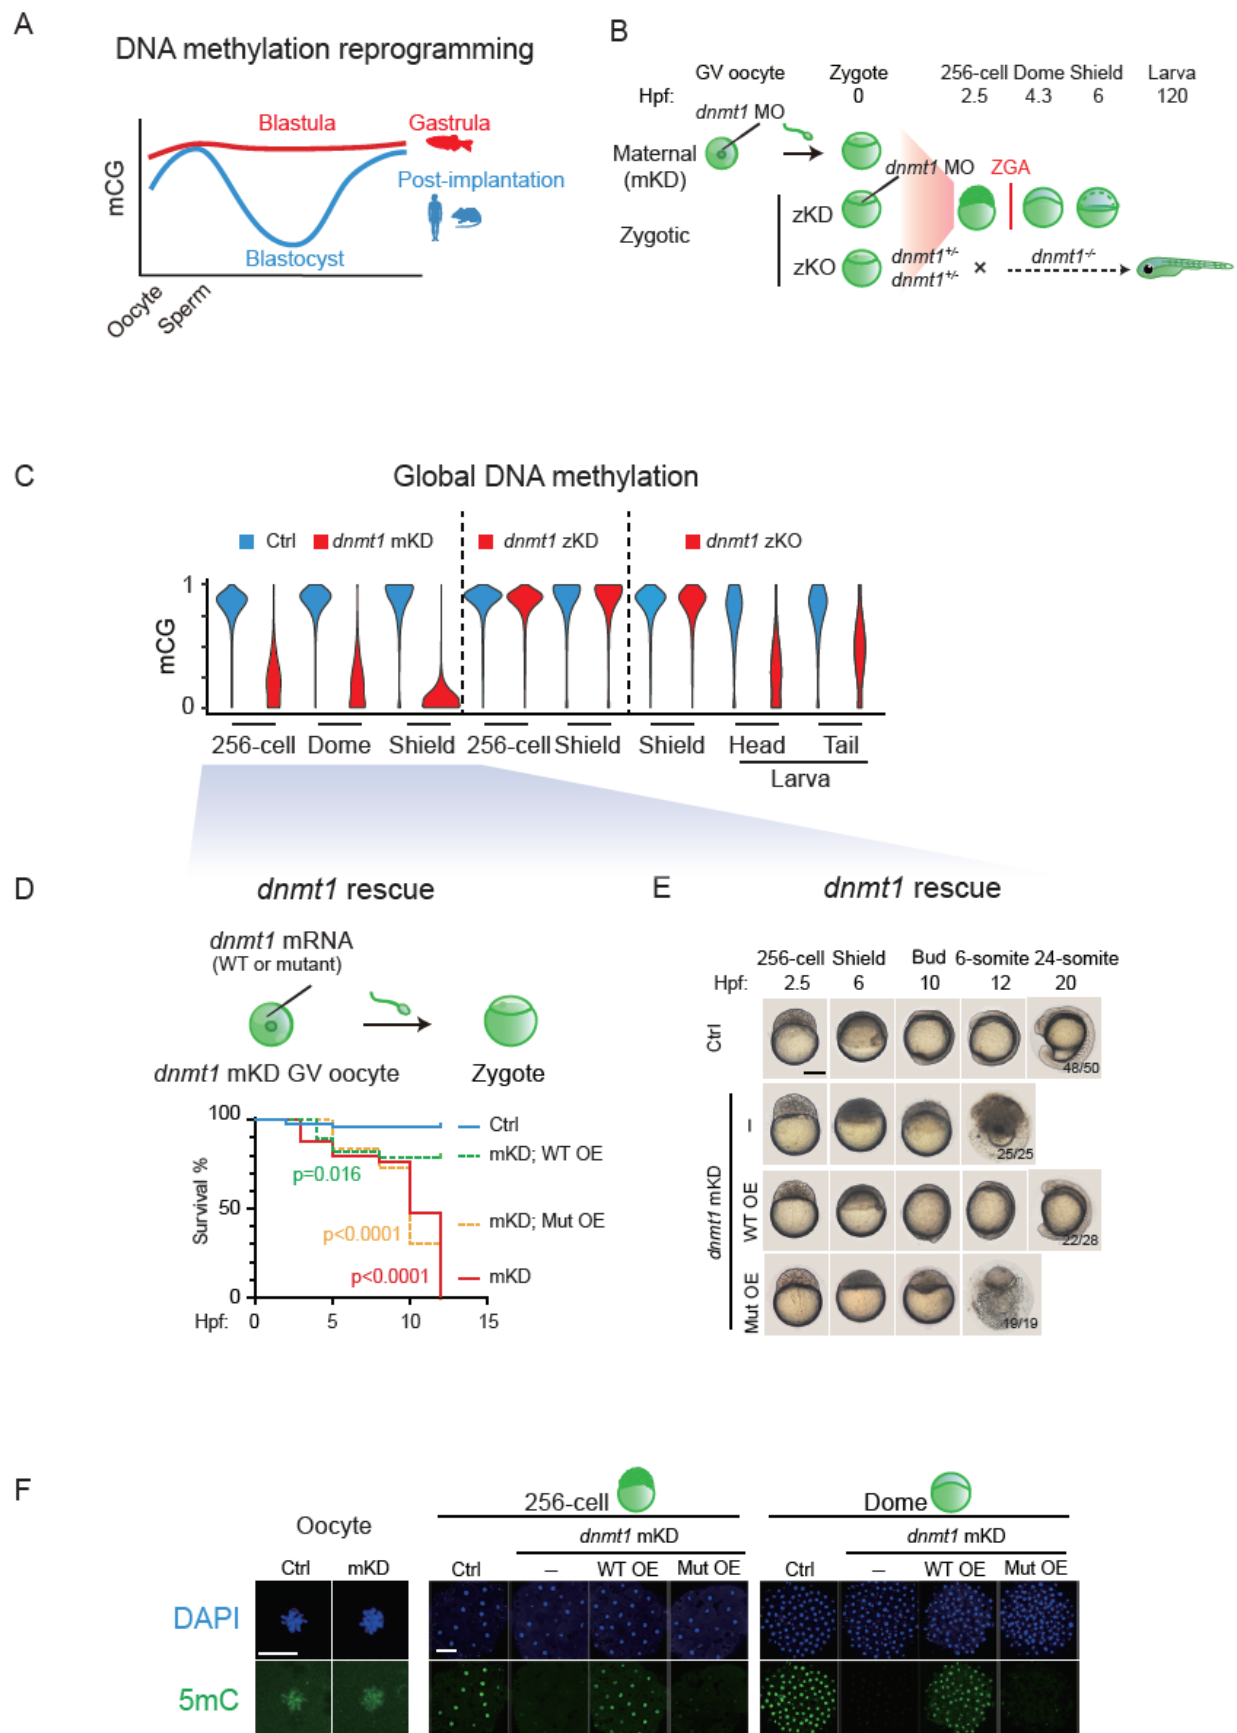

1020 **Fig. 1. Maternal *dnmt1* is essential for embryonic DNA methylation and development.**  
1021 **(A)** Schematic of DNA methylation landscapes in zebrafish (red) and mammals (blue) during early  
1022 development.  
1023 **(B)** Schematic of *dnmt1* maternal knockdown (mKD) via oocyte microinjection *in situ*, zygotic knockdown  
1024 (zKD), and zygotic knockout (zKO). Three main developmental stages were examined in this study, including  
1025 the 256-cell (pre-ZGA), dome and shield stages (post-ZGA). ZGA begins around 3hrs post fertilization (hpf).  
1026 zKO embryos (*dnmt1*<sup>-/-</sup>) could survive till 120hpf. Hpf, hours post fertilization.  
1027 **(C)** Violin plots showing average DNA methylation levels across the genome at different developmental stages  
1028 of control (blue) and *dnmt1* mKD embryos (red), zygotic knockdown (zKD) embryos (red), and zygotic  
1029 knockout (zKO) (red) embryos/larvae.  
1030 **(D)** Survival curve of control (blue line), *dnmt1* mKD embryos (red line), *dnmt1* mKD embryos rescued with  
1031 either WT *dnmt1* mRNAs (mKD; WT OE, green dashed line) or mutant *dnmt1* mRNAs (mKD; Mut OE, orange  
1032 dashed line). Log-rank test was used to calculate P-value.  
1033 **(E)** Representative images of embryo phenotypes in control, *dnmt1* mKD embryos, *dnmt1* mKD embryos  
1034 rescued with either WT *dnmt1* mRNAs (WT OE) or mutant *dnmt1* mRNAs (Mut OE) across different  
1035 developmental stages. The numbers and ratios of embryos with a particular phenotype in each group are also  
1036 shown. Scale bar, 250  $\mu$ m.  
1037 **(F)** Immunostaining of 5mC (green) in control and *dnmt1* mKD oocytes, 256-cell, and dome embryos, as well  
1038 as *dnmt1* mKD embryos rescued by either WT (WT OE) or mutant (Mut OE) *dnmt1* mRNAs. DNA was stained  
1039 with DAPI (blue). Scale bar, 50  $\mu$ m.

Figure 2

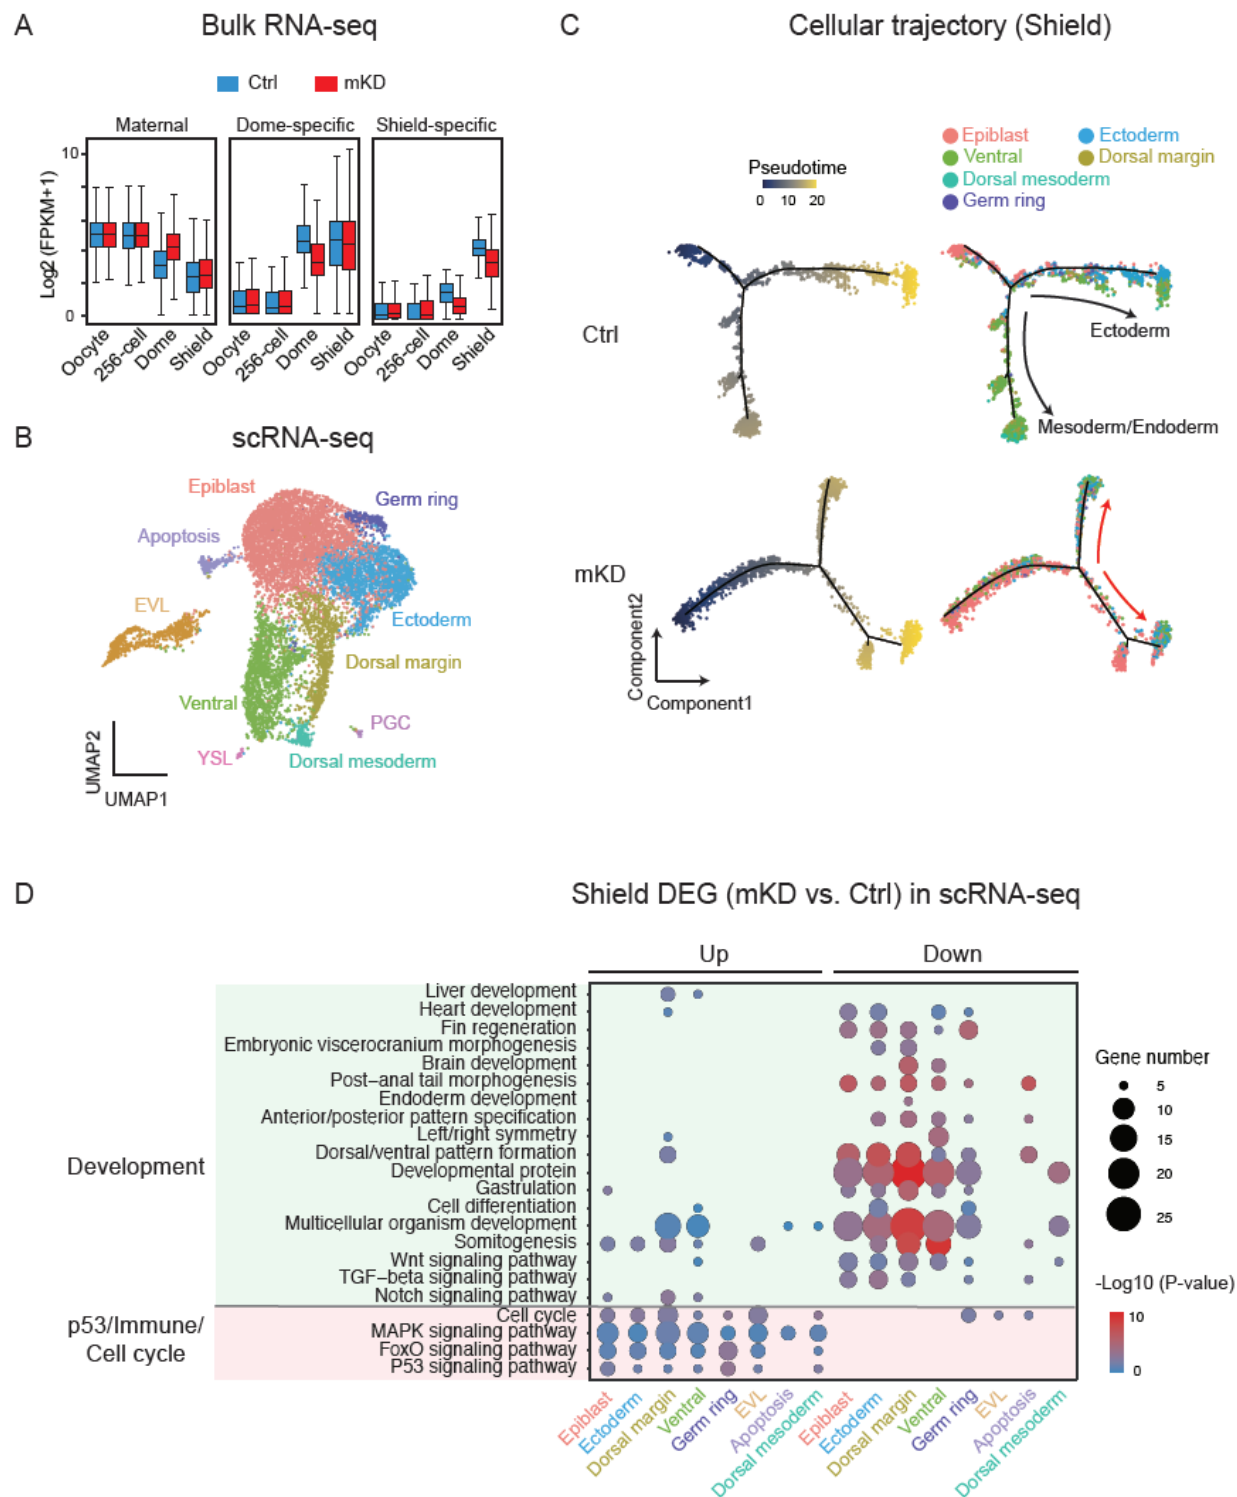

1040 **Fig. 2. Bulk and single-cell RNA-seq revealed developmental defects in mKD embryos.**  
 1041 (A) Distribution of RNA levels of maternal genes (left), dome-specific genes (middle) and shield-specific  
 1042 genes (right) across different developmental stages of control (blue) and *dnmt1* mKD (red) embryos.  
 1043 (B) Projection of cells with UMAP for control and *dnmt1* mKD embryos at dome and shield stages. Cells are  
 1044 colored by clusters.

1045 **(C)** Pseudotime trajectory of control and *dnmt1* mKD embryos at shield stage. Cells were ordered from epiblast  
 1046 to ectoderm or mesoderm and endoderm, and colored by pseudotime (left) or clusters in **b** (right). Red arrows  
 1047 indicate abnormal cell differentiation branches.

1048 **(D)** Bubble plot showing enriched GO terms for differentially expressed genes (DEGs) between control and  
 1049 *dnmt1* mKD embryos of each cluster at shield stage. Top enriched terms include development and *p53*  
 1050 dependent apoptosis, immune response and cell cycle related genes. Size of circle encodes gene number; color  
 1051 of the circle indicates  $-\log_{10}(\text{P-value})$ .



Figure 3

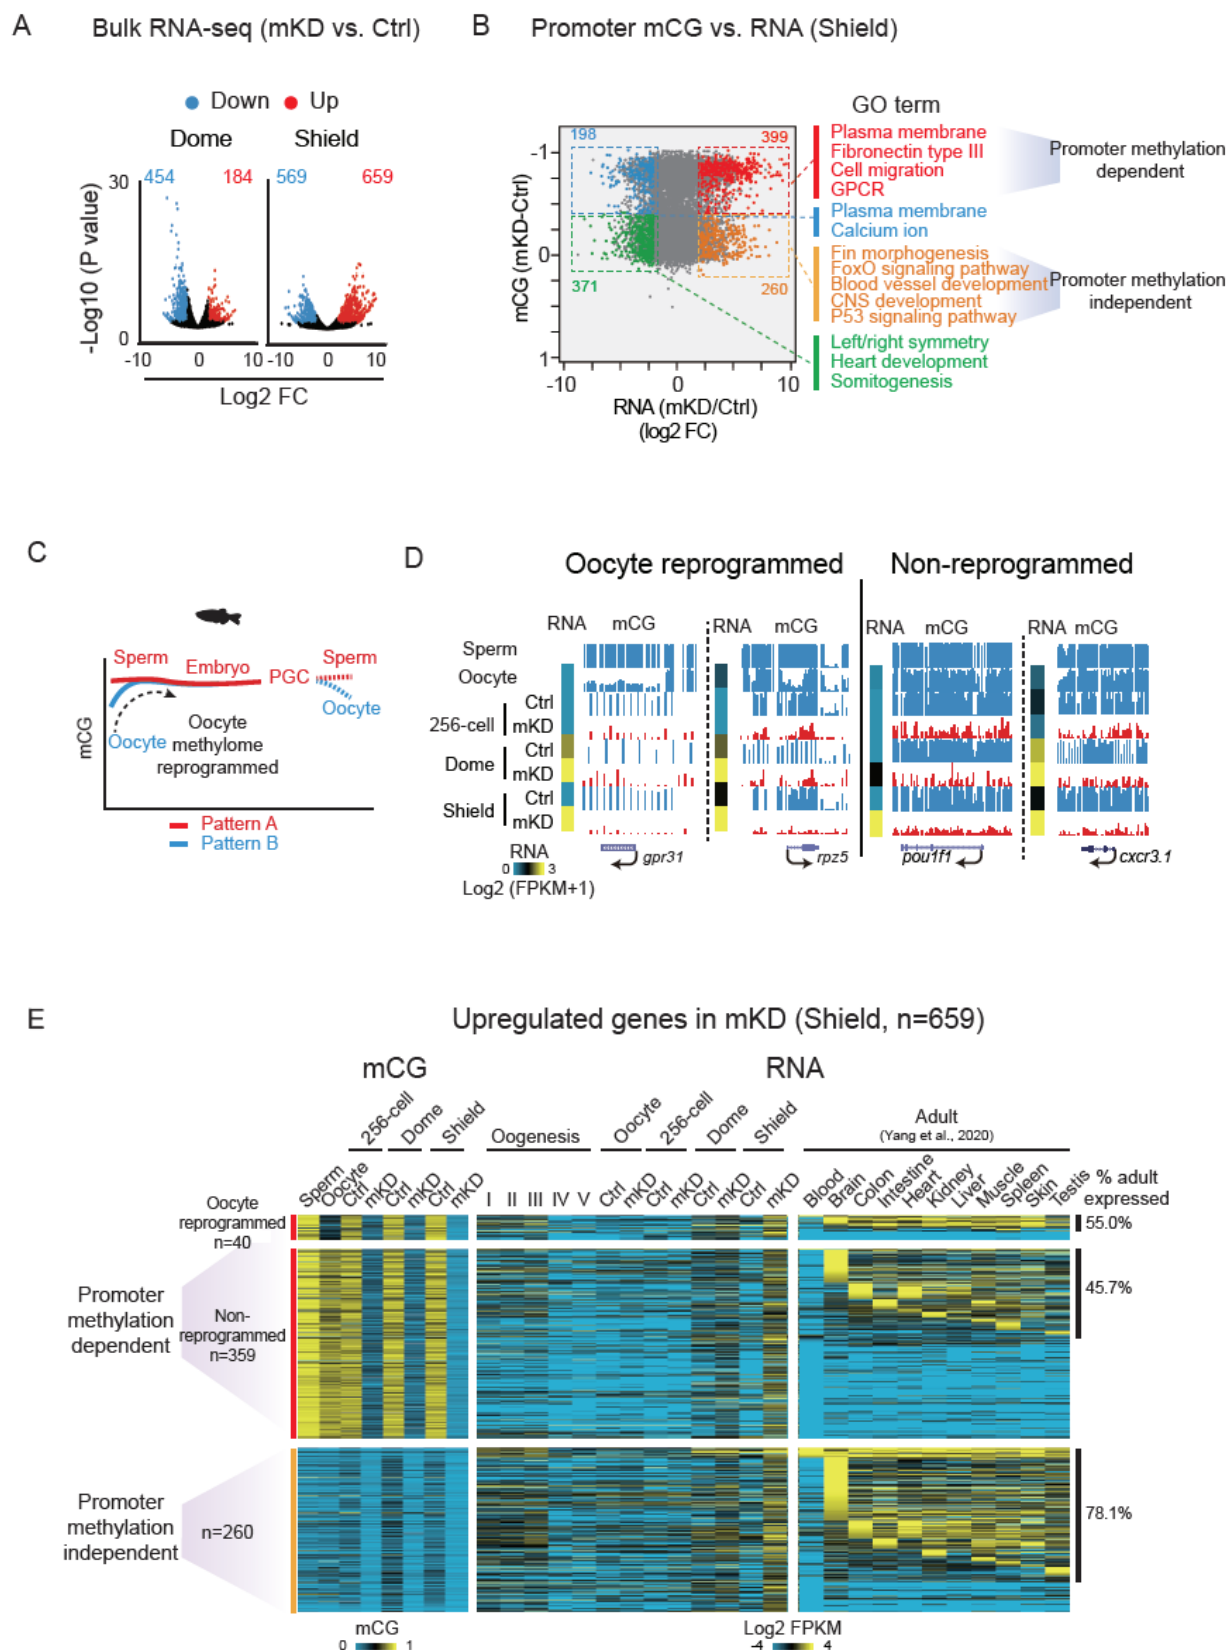

**Fig. 3. Promoter DNA methylation dependent and independent gene derepression in mKD embryos.**

(A) Volcano plots showing gene expression (log<sub>2</sub>(FPKM + 1)) changes between control and *dnmt1* mKD embryos at dome and shield stages. Red dots indicate upregulated genes; blue dots indicate downregulated



1055 genes. The numbers in corresponding colors indicate counts of dysregulated genes.

1056 **(B)** Scatter plots comparing alteration of gene expression ( $\log_2\text{FC}$  (mKD/Ctrl)) and promoter mCG between  
1057 control and *dnmt1* mKD embryos at shield stage. Red and orange dots indicate promoter DNA methylation  
1058 dependent and independent upregulated genes, respectively; blue and green dots indicate downregulated genes  
1059 with decreased and constant promoter DNA methylation, respectively. The numbers of dysregulated genes and  
1060 enriched GO terms in corresponding group (color coded) are also shown.

1061 **(C)** Schematic of DNA methylation reprogramming from gametes to the next generation in zebrafish. Sperm,  
1062 early embryo and PGC exhibit highly similar methylomes (pattern A) (Jiang et al., 2013; Potok et al., 2013;  
1063 Skvortsova et al., 2019). Oocyte has a distinct methylome (pattern B) that will be reprogrammed to pattern A  
1064 after fertilization.

1065 **(D)** UCSC genome browser snapshots showing promoter mCG in sperm, oocyte, 256-cell, dome and shield  
1066 stage embryos. RNA of the 256-cell, dome and shield stage embryos are also shown (heat map).

1067 **(E)** Heat maps showing promoter mCG and RNA expression of promoter DNA methylation dependent or  
1068 independent genes in **b** (n=659) across developmental stages of oogenesis, early embryos and adult tissues  
1069 (56). Promoter DNA methylation dependent genes were further classified into oocyte reprogrammed (mCG  
1070 (dome or shield - oocyte) > 0.4) and non-reprogrammed (mCG (dome or shield - oocyte) ≤ 0.4) groups based  
1071 on the mCG levels in oocyte and early embryos. The ratios of tissue expressed genes (FPKM > 5) in each group  
1072 are also shown, and statistical significance for the enrichment was assessed with one-sided Fisher's exact test.



1081 control and *dnmt1* mKD embryos (RNA change) are also shown (bottom left).  
 1082 **(D)** Pie chart showing the percentages of Polycomb target genes with lost or retained H3K27me3 in *dnmt1*  
 1083 mKD embryos at shield stage, and among “lost” group genes the percentages of genes that are derepressed  
 1084 ( $\log_2\text{FC (mKD/Ctrl)} > 2$ ) and remain repressed (grey) (top). The feature plots of scRNA-seq show RNA  
 1085 expression of example derepressed genes in control and *dnmt1* mKD embryos at dome and shield stages  
 1086 (bottom). Each dot indicates one cell. Red, high expression; blue, low expression.

Figure 5

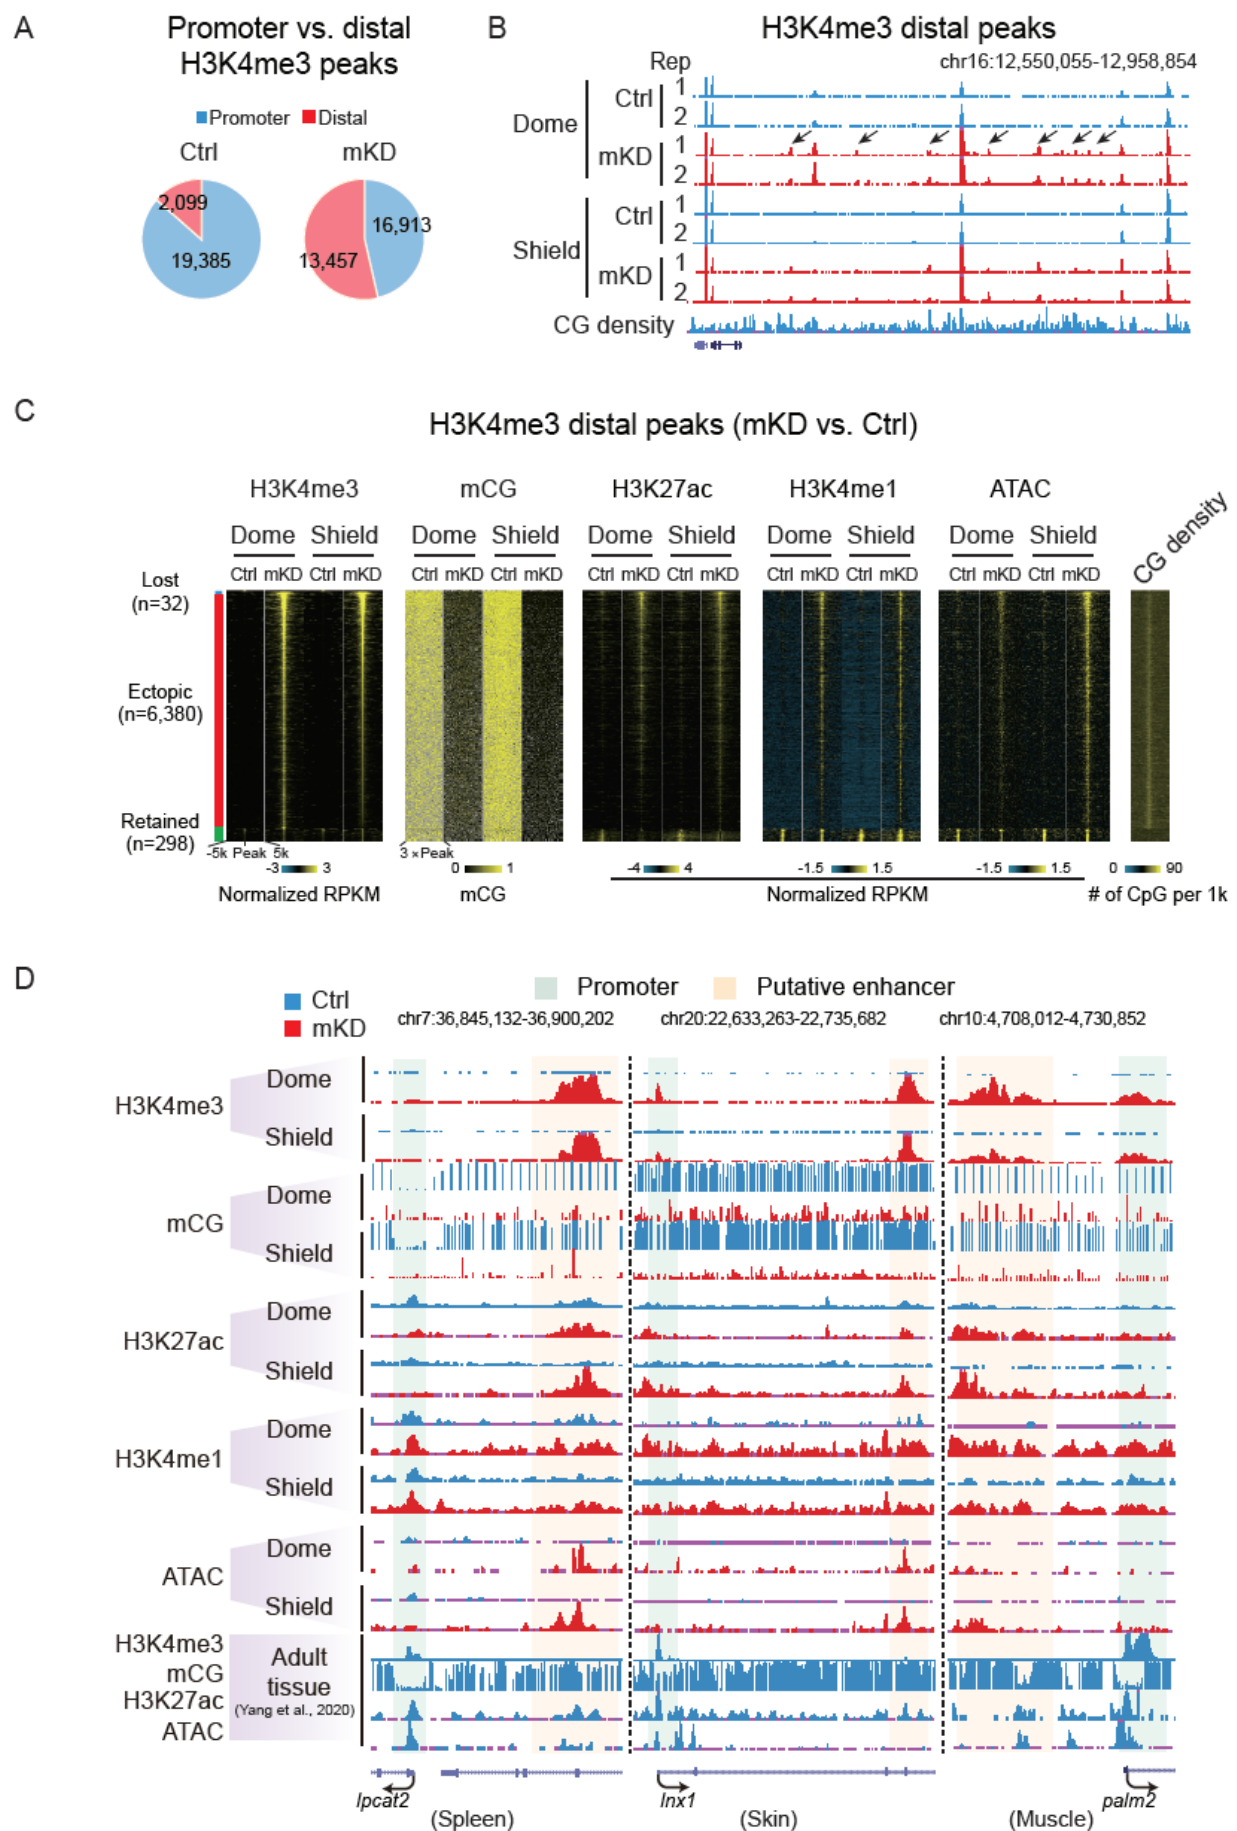

1087 **Fig. 5. Loss of DNA methylation causes ectopic activation of putative adult enhancers and aberrant**  
1088 **acquisition of distal H3K4me3 in early embryos.**  
1089 **(A)** Pie charts showing distributions of promoter (blue) and distal (red) H3K4me3 sites in control and mKD  
1090 embryos at shield stage.  
1091 **(B)** UCSC genome browser snapshot showing H3K4me3 at dome and shield stages of control (blue) and *dnmt1*  
1092 mKD (red) embryos, and CG density. Arrows indicate ectopic H3K4me3 sites.  
1093 **(C)** Heat maps showing distal H3K4me3, mCG, H3K27ac, H3K4me1, open chromatin (ATAC-seq) and CG  
1094 density in either control or *dnmt1* mKD embryos. Peaks were classified into three clusters based on the  
1095 dynamics of distal H3K4me3: lost (H3K4me3 lost in *dnmt1* mKD embryos, blue), ectopic (H3K4me3 acquired  
1096 in *dnmt1* mKD embryos, red), and retained (H3K4me3 present in both control and mKD, green).  
1097 **(D)** UCSC genome browser snapshots showing H3K4me3, mCG, H3K27ac, H3K4me1, and open chromatin  
1098 (ATAC-seq) at dome and shield stages of control (blue) and *dnmt1* mKD (red) embryos, and adult tissues  
1099 (Spleen, left; Skin, middle; Muscle, right) (56). Green shadow indicates promoter, and orange shadow indicates  
1100 putative enhancer.

Figure 6

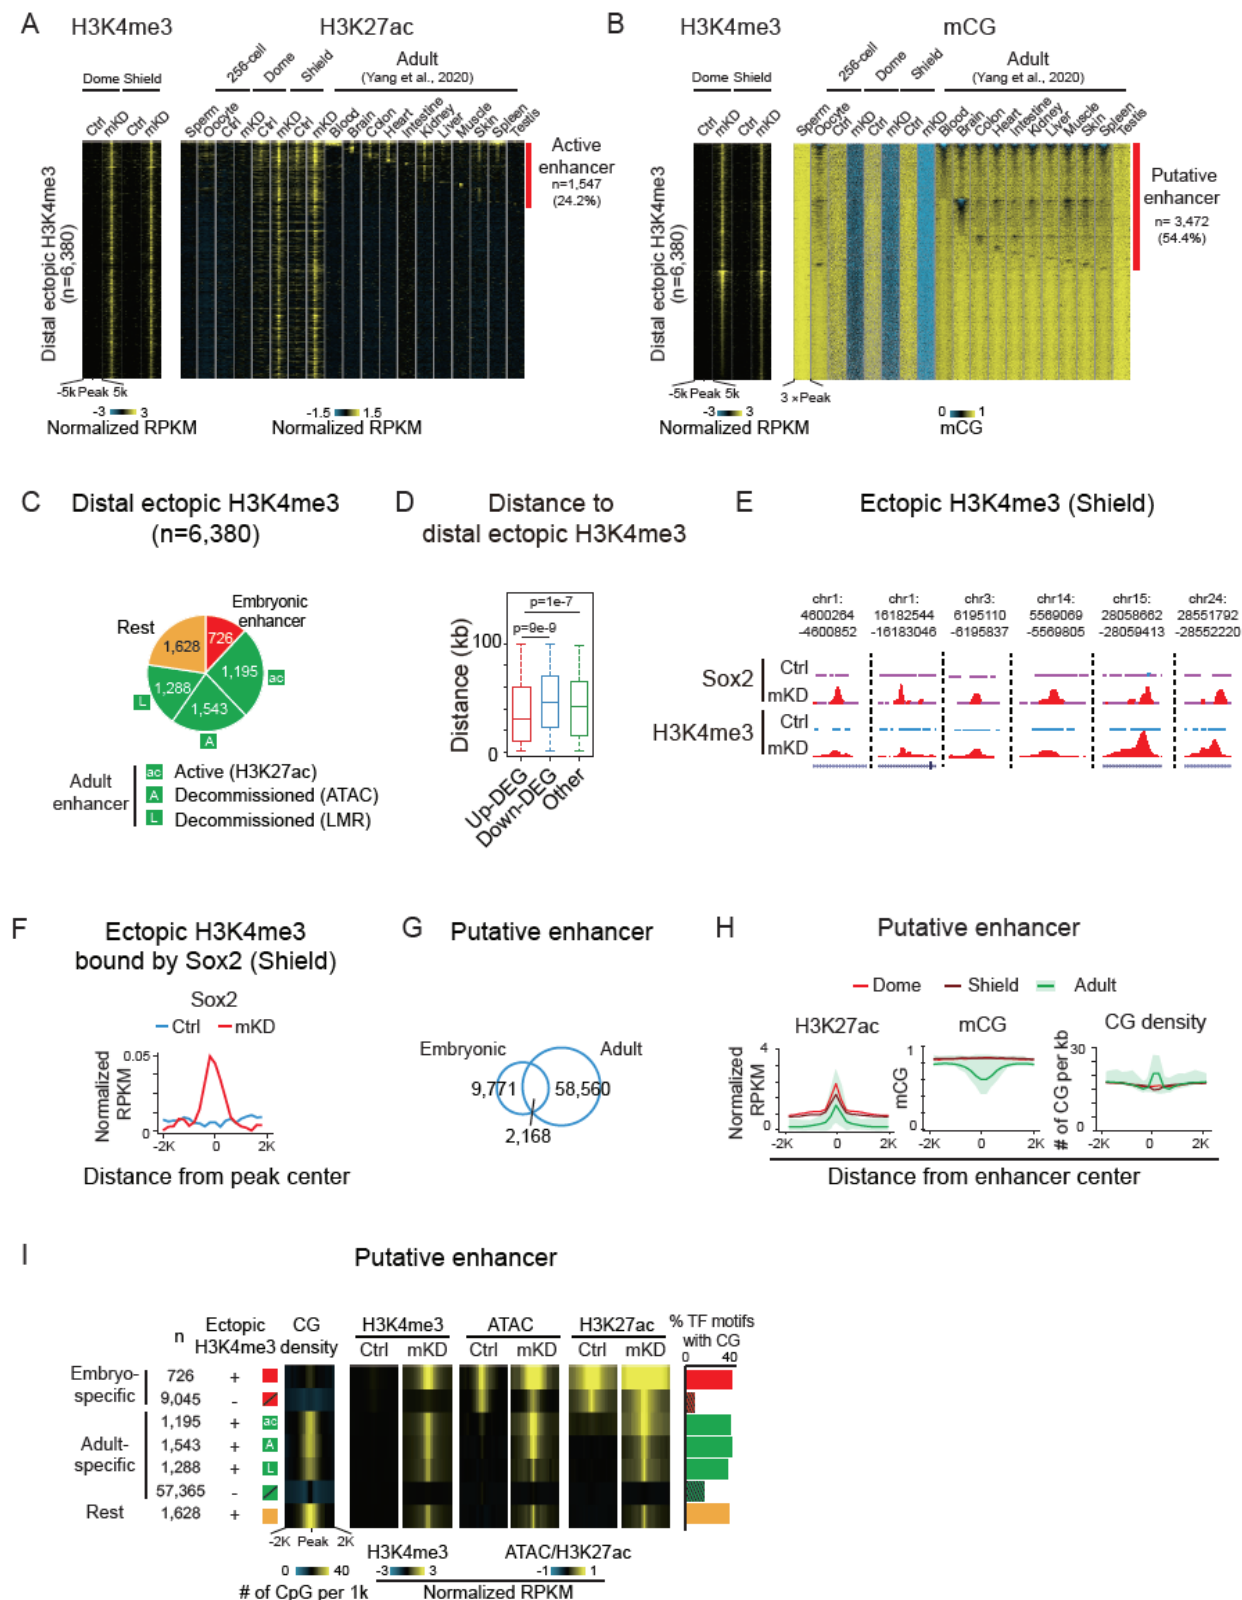

**Fig. 6. DNA methylation resets embryonic and adult programs in zebrafish through blocking high CG density adult enhancers.**

(A) Heat maps showing distal H3K4me3 and H3K27ac around distal ectopic H3K4me3 peaks in either control or *dnmt1* mKD embryos, and WT sperm, oocyte, and adult tissues (56). Peaks with H3K27ac signals in adult



1105 tissues are defined as active enhancers (red).

1106 **(B)** Heat maps showing distal H3K4me3 and mCG around distal ectopic H3K4me3 peaks in either control or  
1107 *dnmt1* mKD embryos, and WT sperm, oocyte, and adult tissues (56). LMRs (lowly methylation regions) in  
1108 adult tissues are defined as putative enhancers (red).

1109 **(C)** Pie chart showing distribution of distal ectopic H3K4me3 overlapping with embryonic enhancers (red),  
1110 active adult enhancers (green, “ac”, defined by distal H3K27ac), decommissioned adult enhancers (green, “A”,  
1111 defined by ATAC-seq without H3K27ac; “L”, defined by LMRs without H3K27ac), and the rest ectopic  
1112 H3K4me3 sites (“rest”, orange).

1113 **(D)** Box plot showing distance from center of distal ectopic H3K4me3 peaks to upregulated (red),  
1114 downregulated (blue), and non-DEGs (green) in *dnmt1* mKD embryos at shield stage.

1115 **(E)** UCSC genome browser snapshots showing Sox2 binding and H3K4me3 at shield stage in control (blue)  
1116 and *dnmt1* mKD (red) embryos.

1117 **(F)** Line chart showing average Sox2 binding distribution around ectopic H3K4me3 regions acquiring Sox2  
1118 at shield stage in control (blue) and *dnmt1* mKD (red) embryos.

1119 **(G)** Venn diagram showing overlap between embryonic (dome and shield combined) and adult enhancers (11  
1120 adult tissues combined) (56).

1121 **(H)** Line charts showing H3K27ac, mCG, and CG density in control embryos at dome (red) and shield (dark  
1122 red) stages, and adult tissues (56) (green line, average value of all tissues; green shade, range of all tissues)  
1123 around putative enhancer regions defined at each stage.

1124 **(I)** Heat maps showing average CG density, H3K4me3, open chromatin (ATAC-seq) and H3K27ac (56) in  
1125 various classes of putative enhancers in either control and mKD embryos. Definitions of putative enhancer  
1126 classes are shown on the left: red box, embryonic-specific enhancer with distal ectopic H3K4me3; crossed red  
1127 box, embryonic-specific enhancer without distal ectopic H3K4me3; green boxes with “ac”, “A”, and “L”, three  
1128 clusters of adult enhancers with distal ectopic H3K4me3 defined in c; crossed green box, adult enhancers  
1129 without distal ectopic H3K4me3; orange box, the rest distal ectopic H3K4me3. The numbers of putative  
1130 enhancers are also shown for each class. Bar chart shows the ratios of top enriched TF motifs (p-value < 1e-  
1131 20) in putative enhancers that contain CGs for each class (right).

Figure 7

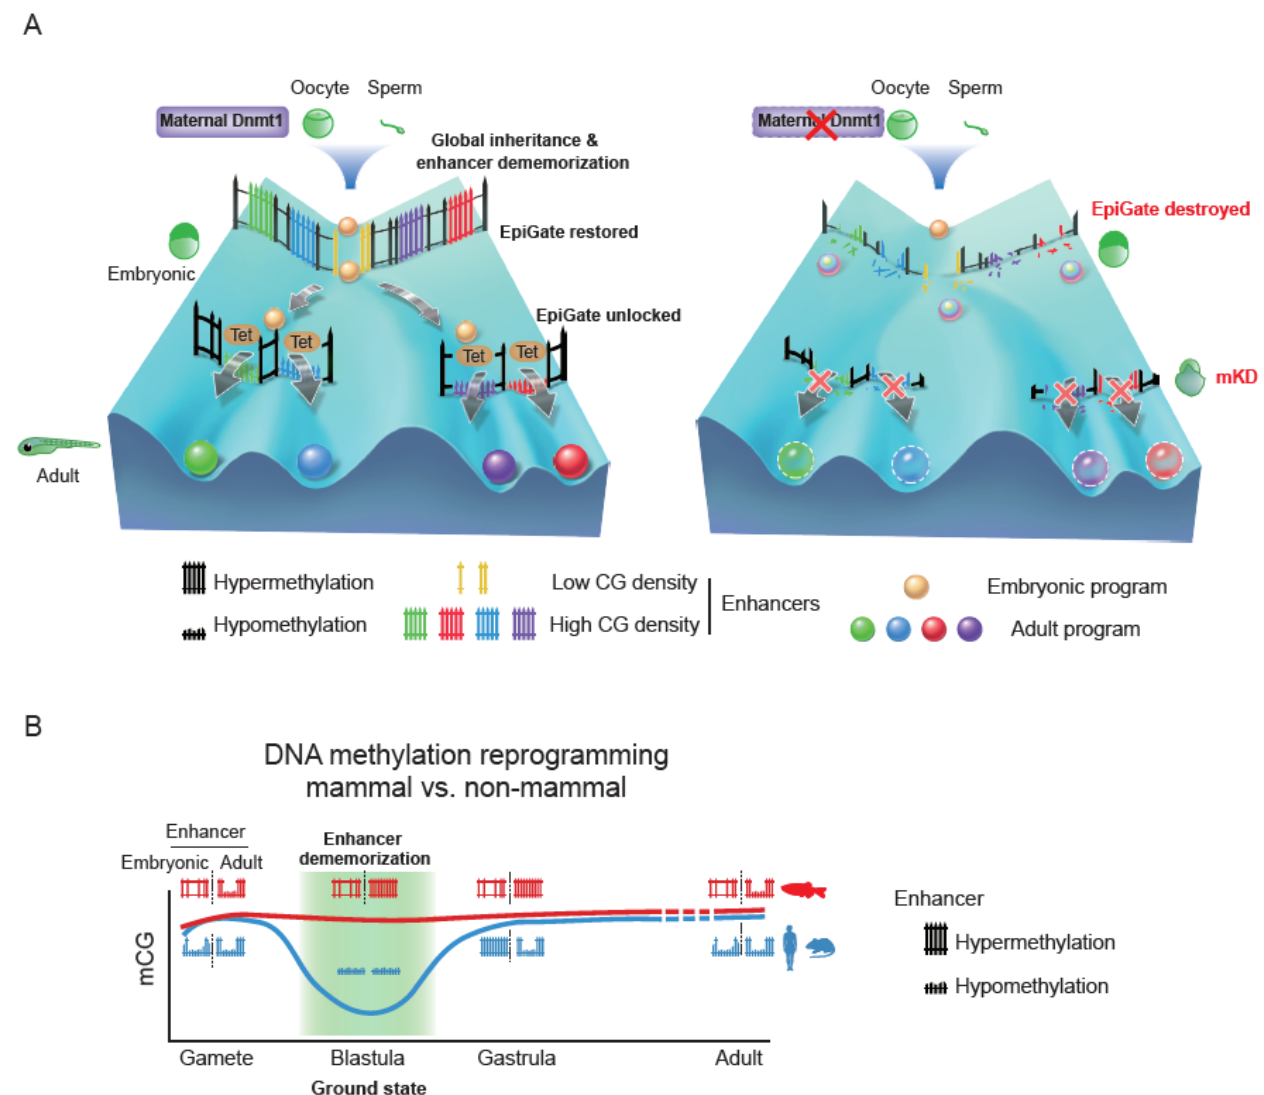

**Fig. 7. Inherited methylome coupled by enhancer dememorization resets an epigenetic gate that safeguards embryonic programs.**

(A) Maternal Dnmt1 mediated inherited global DNA methylome coupled with enhancer dememorization plays an instrumental role in restoring a full methylome to ultimately safeguard embryonic development against premature activation of adult programs. In WT embryos, inherited methylome sets up an “EpiGate” after fertilization and effectively repress adult enhancers, which are preferentially CG-rich. Embryonic enhancers, which are CG-poor, are however insensitive to DNA methylation, and can function while hypermethylated and instruct embryonic transcription program. At the phylotypic stage, expression of *tet* genes demethylate CG-rich adult enhancers, allowing their activation and cell lineage differentiation. While in maternal *dnmt1* mKD embryos, inherited DNA methylome failed to be maintained after fertilization, hence destroying the “EpiGate”. This leads to aberrant activation of adult programs in early embryos, accompanied by developmental failure and embryonic lethality around gastrulation.

(B) Enhancer dememorization resets the developmental clock by restoring a “ground state” (green shade) free of parental epigenetic memories in both mammals (blue, human and mouse) and non-mammalian vertebrate (red, zebrafish) around blastula stage. Such epigenetic resetting is achieved

1147 through global DNA remethylation and demethylation in mammals, and through enhancer  
 1148 hypermethylation in zebrafish. Embryonic enhancers are then demethylated in gastrula only in  
 1149 mammals, where TETs are expressed, but not in zebrafish, where TETs are still silenced. Zebrafish  
 1150 embryonic enhancers are nevertheless functioning presumably due to their low CG densities and  
 1151 insensitivity to DNA methylation. Adult enhancers are subsequently demethylated by TETs in both  
 1152 mammals and zebrafish. In mammals, embryonic enhancers also remain hypomethylated in adult  
 1153 tissues despite being decommissioned (16, 17).
